# Special Offer for APA Members

\$84 APA Member Subscription to *Psychiatric Services*

25% off the nonmember price!

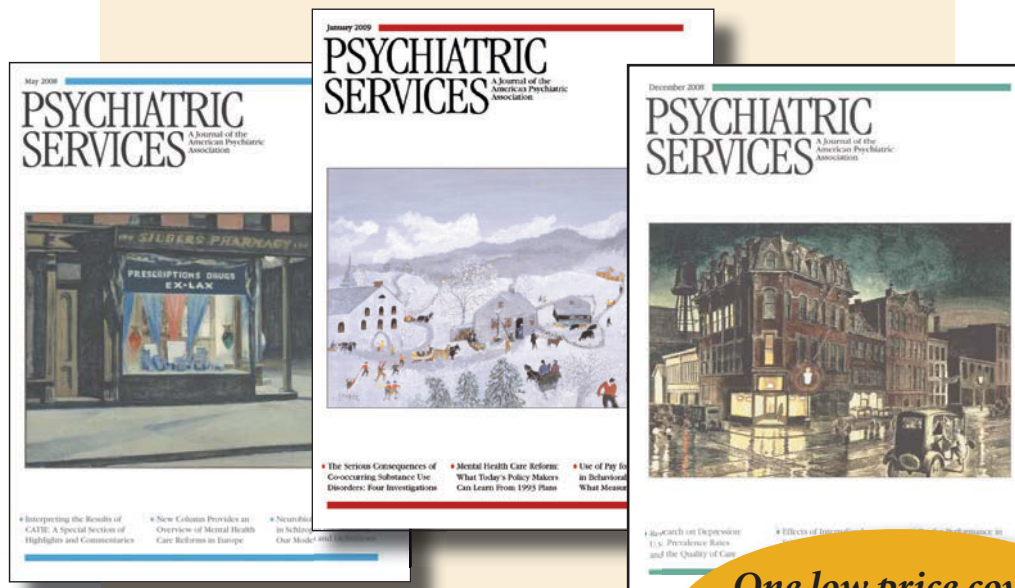

One low price covers  
your print and online  
subscription

Starting with the July 2009 issue, APA members will no longer receive *Psychiatric Services* as a free member benefit.

Each issue covers an array of topics, with a focus on people with serious mental illness:

- Evidence-based and best practices: delivering effective services and programs
- Recovery-oriented, client-centered care: how systems are being transformed
- Racial-ethnic disparities in care: how they arise and how to overcome them
- Criminal justice involvement and homelessness: diversion and housing programs
- Use of medications: improving adherence, monitoring trends and treatment adequacy
- Medicaid changes and recent court cases: what they mean for your practice

For more information or to subscribe,  
call Customer Service at 1-800-368-5777  
or visit [www.appi.org](http://www.appi.org)

Order today and make sure that you don't miss an issue!\*

\*If you currently receive *Psychiatric Services* as a free member benefit, your order for a year's subscription will be processed to begin with the July 2009 issue.

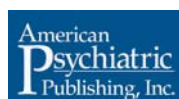

The *First* and *Last* Word in Psychiatry

Order Online: [www.appi.org](http://www.appi.org) • Toll Free: 1-800-368-5777 • Fax: 703-907-1091 • Email: [appi@psych.org](mailto:appi@psych.org)  
Priority Code AH901

**Osler Institute 135<sup>th</sup> to 140<sup>th</sup>  
Psychiatry Review Courses**  
*approved for AMA/PRA category 1 credit*

**for Written Exams**

March 30-April 3, 2009 – Boston

**for Oral Boards**

Didactic day & 3-day mock orals

March 30 & March 31-April 2 – Boston

June 8 & 9-11 – Denver

September 7 & 8-10, 2009 – Kansas City

**for Child and Adolescent**

April 1-4, 2009 – Boston

November 9-12, 2009 – Baltimore

**New – Best of Psych Audio**

**Call Today: (800) 356-7537**

**www.osler.org**

Y93

AMERICAN PSYCHIATRIC ASSOCIATION

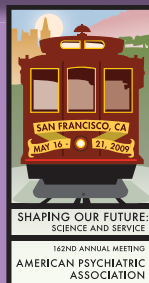

**Register Now!**

*Save the Date!*

**American Psychiatric Association  
162nd Annual Meeting  
May 16-21, 2009  
Moscone Center - San Francisco, CA**

**Join us for the premier scientific meeting  
of the year in the grand city of  
San Francisco, CA**

- Earn Up to 66 hours of AMA PRA Category 1 Credits™.
- World-renowned lecturers including Irvin Yalom M.D. and Dean Ornish M.D.
- State-of-the-art clinical practice updates and cutting-edge science.
- The ever popular *Advances In* series expanded.
- Frontiers in Science, Distinguished Psychiatrists, and Presidential Symposia.
- Order access (online and/or DVD-ROM) to the 2009 Annual Meeting Online highlights at special attendee prices.

San Francisco Convention & Visitors Bureau photo.

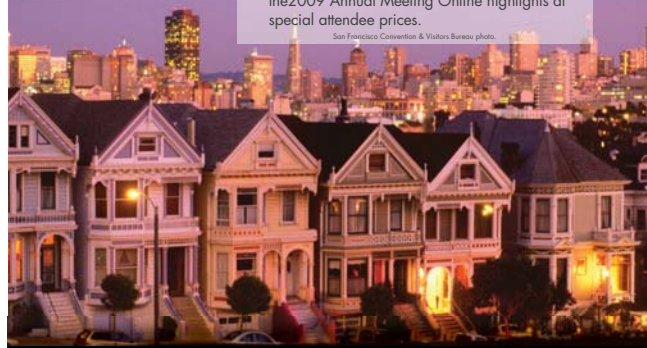

**Register online at: [www.psych.org](http://www.psych.org)**

*New mental health treatment center in Ohio*

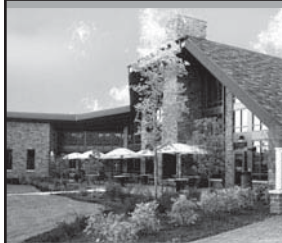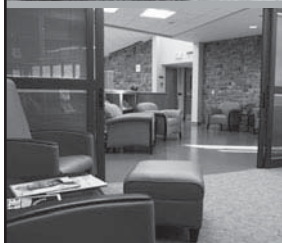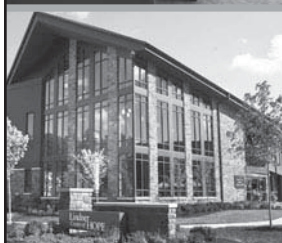

**Sibly House**  
at Lindner Center of HOPE

*To learn more about Sibly House, visit our website or email a request for more information to [info@lindnercenter.org](mailto:info@lindnercenter.org).*

Sibly House at Lindner Center of HOPE provides highly specialized and individualized treatment for individuals age 18 and older seeking the highest caliber in mental health care services. Designated for private pay, voluntary live-in patients, a typical stay at Sibly House is 28 days; however, a five-day intensive diagnostic short stay is also available.

- *Expertise:* Evidence-based and expert driven psychopharmacologic and psychotherapeutic interventions
- *Individualized:* Highly specialized treatment plans, tailored to specific needs
- *Comfort:* Therapeutic retreat-like environment that is discreet, safe and open

Sibly House and Lindner Center of HOPE are based on a collaborative philosophy, ensuring rapid communication and seamless transition for patients among care providers.

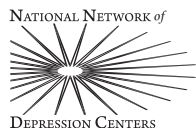

Paul E. Keck, Jr., M.D.  
*President and Chief Executive Officer,  
Lindner Center of HOPE*

*Sibly House and Lindner Center of HOPE are affiliated with*

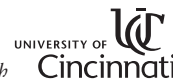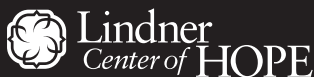

513-536-0537 or 888-536-HOPE (4673)

[www.siblyhouse.org](http://www.siblyhouse.org)

**You May Qualify If You:**

1. Are a psychiatrist residing in the U.S. or Canada and,
2. Have paid the full-time registration fee for the Annual Meeting (\$850.00/advance, \$940.00/on-site).

**To Apply:**

1. Stop by the APA Member Center to fill out an APA Membership Application on-site during the meeting.
2. Provide proof of ACGME-AOA or RCPS(C)—approved psychiatry residency training and a current, valid medical license to APA no later than June 30, 2009.

**How the Rebate Works:**

1. Your local psychiatric District Branch must approve the application no later than September 30, 2009.
2. The difference between the member and non-member Annual Meeting registration fee will be applied towards your pro-rated 2009 national and local dues.

Please stop by the APA Member Center at the Annual Meeting to learn more about the many benefits of APA membership.

# Isaac Ray Award

The American Psychiatric Association and the American Academy of Psychiatry and the Law invites nominations for the Isaac Ray Award for 2010. This Award honors Dr. Isaac Ray, one of the original founders and the fourth President of the American Psychiatric Association, and is presented to a person who has made outstanding contributions to forensic psychiatry or to the psychiatric aspects of jurisprudence. The Award, which will be presented at the Convocation of Fellows at the Annual Meeting of the American Psychiatric Association in New Orleans, LA, in May 2010, includes an honorarium of \$1,500. The recipient obligates him or herself to deliver a lecture or series of lectures on these subjects and to present the manuscript for publication.

Nominations are requested as follows:

- ♦ a primary nominating letter (sent with the consent of the candidate), which includes a curriculum vitae and specific details regarding the candidate's qualifications for the Award.
- ♦ a supplemental letter from a second nominator in support of the candidate.

Additional letters related to any particular candidate will not be accepted or reviewed by the Award Committee. Nominators should not submit letters on behalf of more than one candidate. Nominations will be kept in the pool of applicants for two years.

**The deadline for receipt of nominations is July 1, 2009.**

Nominations, as outlined above, should be submitted to:

**J. Richard Ciccone, M.D.**  
 Chairperson  
 Isaac Ray Award Committee  
 American Psychiatric Association  
 1000 Wilson Boulevard, Suite 1825  
 Arlington, VA 22209

## AMERICAN ACADEMY OF CHILD & ADOLESCENT PSYCHIATRY

WWW.AACAP.ORG

# eAACAP

## CME OPPORTUNITIES

eAACAP offers a series of e-learning initiative to provide health professionals with the latest research and treatment options in mental health for children and adolescents.

**Complete Your CME Today—Programs Expire Soon!**

**2008 Psychopharmacology Update**  
 Earn up to 13.5 hours of CME credit.  
 Expiration Date: April 30, 2009  
 This activity is supported through an educational grant from Eli Lilly and Company.

**Early Onset Bipolar Disorder: What Those in the Know, Know**  
 Earn 2 hours of CME credit.  
 Expiration Date: April 18, 2009  
 This activity is supported through educational grants from Bristol-Myers Squibb and Eli Lilly and Company.

**Alcohol & Other Substance Use Disorders Curriculum for Child & Adolescent Psychiatry Practitioners, Residents and Other Health Professionals**  
 Earn 5.5 hours of CME credit.  
 Expiration Date: July 1, 2009  
 This activity is supported through an educational grant from Shire.

Learn from the best and earn CME credit today with eAACAP at [www.aacap.org/cs/onlinecme](http://www.aacap.org/cs/onlinecme).

IN THE TREATMENT OF SCHIZOPHRENIA

 **INVEGA**<sup>®</sup>  
PALIPERIDONE  
Extended-Release Tablets

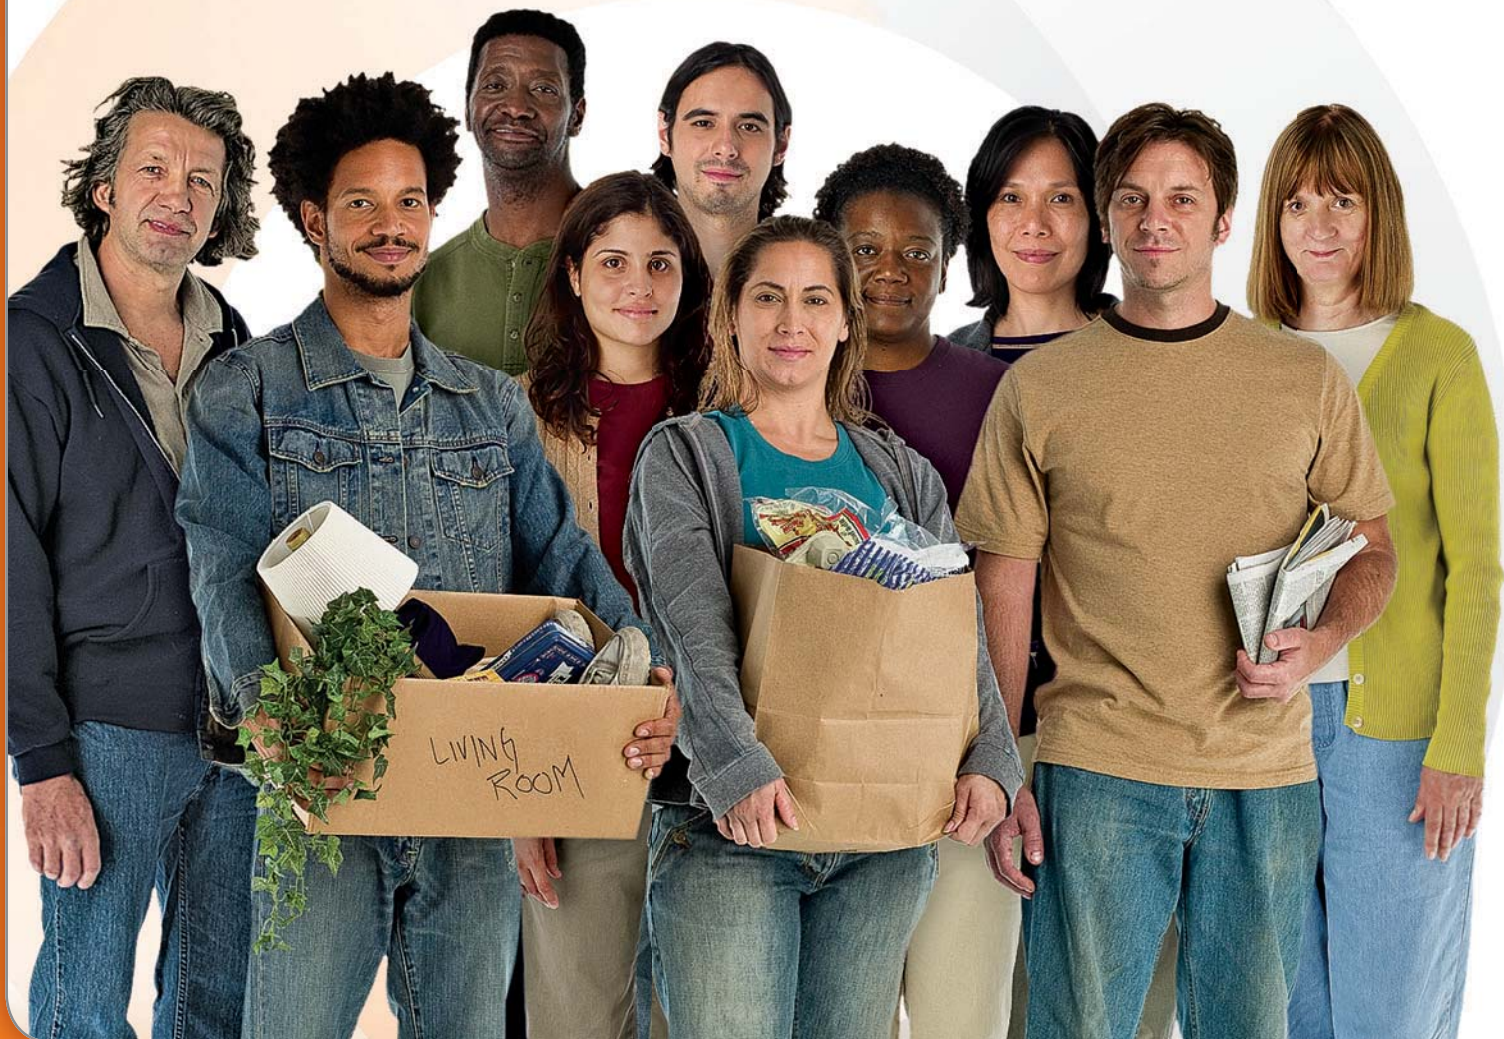

INVEGA<sup>®</sup> (paliperidone) extended-release tablets are indicated for the acute and maintenance treatment of schizophrenia.

**IMPORTANT SAFETY INFORMATION FOR INVEGA<sup>®</sup>**

**Increased Mortality in Elderly Patients with Dementia-Related Psychosis**

Elderly patients with dementia-related psychosis treated with antipsychotic drugs are at an increased risk of death. Analyses of 17 placebo-controlled trials (modal duration of 10 weeks), largely in patients taking atypical antipsychotic drugs, revealed a risk of death in the drug-treated patients of between 1.6 to 1.7 times the risk of death in placebo-treated patients. Over the course of a typical 10-week controlled trial, the rate of death in drug-treated patients was about 4.5%, compared to a rate of about 2.6% in the placebo group. Although the causes of death were varied, most of the deaths appeared to be either cardiovascular (e.g., heart failure, sudden death) or infectious (e.g., pneumonia) in nature. Observational studies suggest that, similar to atypical antipsychotic drugs, treatment with conventional antipsychotic drugs may increase mortality. The extent to which the findings of increased mortality in observational studies may be attributed to the antipsychotic drug as opposed to some characteristic(s) of the patients is not clear. INVEGA<sup>®</sup> (paliperidone) is not approved for the treatment of patients with dementia-related psychosis.

**Cerebrovascular Adverse Events (CAEs):** CAEs, including fatalities, have been reported in elderly patients with dementia-related psychosis taking atypical antipsychotics in clinical trials. INVEGA<sup>®</sup> is not approved for treating these patients.

**Neuroleptic Malignant Syndrome (NMS):** NMS, a potentially fatal symptom complex, has been reported with the use of antipsychotic medications, including INVEGA<sup>®</sup>. Clinical manifestations include muscle rigidity, fever, altered mental status and evidence of autonomic instability (see full Prescribing Information). Management should include immediate discontinuation of antipsychotic drugs and other drugs not essential to concurrent therapy, intensive symptomatic treatment and medical monitoring, and treatment of any concomitant serious medical problems.

**QT Prolongation:** INVEGA<sup>®</sup> causes a modest increase in the corrected QT (QTc) interval. INVEGA<sup>®</sup> should be avoided in combination with other drugs that are known to prolong the QTc interval, in patients with congenital long QT syndrome or a history of cardiac arrhythmias. Certain circumstances may increase the risk of torsades de pointes and/or sudden death in association with the use of drugs that prolong the QTc interval.

**Tardive Dyskinesia (TD):** TD is a syndrome of potentially irreversible, involuntary, dyskinetic movements that may develop in patients treated with antipsychotic medications. The risk of developing TD and the likelihood that dyskinetic movements will become irreversible are believed to increase with duration of treatment and total cumulative dose. Elderly patients appeared to be at increased risk for TD. Prescribing should be consistent with the need to minimize the risk of TD. The syndrome may remit, partially or completely, if antipsychotic treatment is withdrawn.

**Hyperglycemia and Diabetes:** Hyperglycemia, some cases extreme and associated with ketoacidosis, hyperosmolar coma or death has been reported in patients treated with atypical antipsychotics (APS). Patients starting treatment with APS who have or are at risk for diabetes should undergo fasting blood glucose testing at the beginning of and during treatment. Patients who develop symptoms of hyperglycemia should also undergo fasting blood glucose testing.

**Hyperprolactinemia:** As with other drugs that antagonize dopamine D<sub>2</sub> receptors, INVEGA<sup>®</sup> elevates prolactin levels and the elevation persists during chronic administration.

# INVEGA®—Powerful Efficacy With Safety and Tolerability

Plus additional features to consider

## Metabolism and Excretion

- CYP450 isozymes play a limited role in the overall metabolism of INVEGA®
  - Less than 10% of the dose is metabolized by each of the 4 identified metabolic pathways (dealkylation, hydroxylation, dehydrogenation, and benzisoxazole scission)
- Primarily excreted unchanged via the kidneys
  - Dosing must be individualized according to the patient's renal function status. The maximum recommended dose of INVEGA® is 6 mg for patients with mild renal impairment and 3 mg for patients with moderate to severe renal impairment

## Innovative Drug Delivery System

- Innovative OROS® extended-release technology for reduced peak/trough fluctuations\*<sup>1</sup>

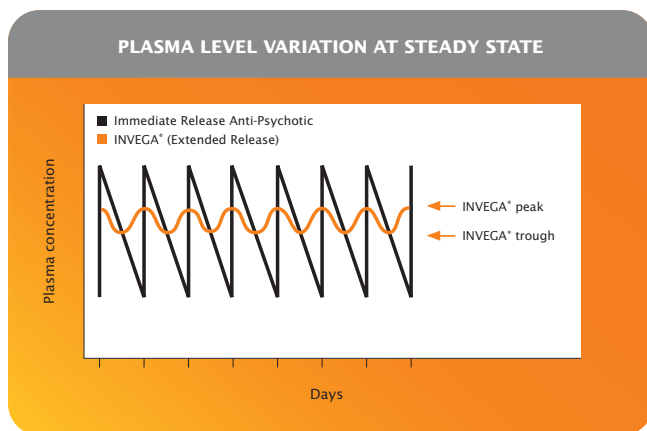

**\*Correlation to clinical effect has not been established.**

OROS is a registered trademark of ALZA Corporation.

**Potential for Gastrointestinal Obstruction:** INVEGA® should ordinarily not be administered to patients with pre-existing severe gastrointestinal narrowing. Rare instances of obstructive symptoms have been reported in patients with known strictures taking nondeformable formulations. INVEGA® should only be used in patients who are able to swallow the tablet whole.

**Orthostatic Hypotension and Syncope:** INVEGA® may induce orthostatic hypotension associated with dizziness, tachycardia, and in some patients, syncope, especially during the initial dose-titration period. Monitoring should be considered in patients for whom this may be of concern. INVEGA® should be used with caution in patients with known cardiovascular disease, and conditions that would predispose patients to hypotension.

**Potential for Cognitive and Motor Impairment:** INVEGA® has the potential to impair judgment, thinking, or motor skills. Patients should be cautioned about operating hazardous machinery, including motor vehicles, until they are reasonably certain that INVEGA® does not affect them adversely.

**Seizures:** INVEGA® should be used cautiously in patients with a history of seizures.

**Suicide:** The possibility of suicide attempt is inherent in psychotic illnesses and close supervision of high-risk patients should accompany drug therapy.

**Maintenance Treatment:** Physicians who elect to use INVEGA® for extended periods should periodically re-evaluate the long-term risks and benefits of the drug for the individual patient.

**Drug Interactions:** Co-administration of INVEGA® 6 mg once daily with carbamazepine 200 mg twice daily caused a decrease of approximately 37% in the mean steady-state  $C_{max}$  and AUC of paliperidone. On initiation or discontinuation of carbamazepine, the dose of INVEGA® should be re-evaluated and adjusted if necessary. Given the primary CNS effects of INVEGA®, INVEGA® should be used with caution in combination with other centrally acting drugs and the use of alcohol should be avoided.

**Extrapyramidal Symptoms (EPS):** Total EPS-related adverse events in the higher 9-mg and 12-mg treatment groups were 25% and 26%, respectively, versus 11% for the placebo group.

**Weight Gain:** The proportion of subjects having a weight gain of  $\geq 7\%$  body weight were comparable to placebo (5%) for 3 mg (7%) and 6 mg (6%). A higher incidence was seen for 9 mg (9%) and 12 mg (9%).

**Renal Impairment:** Dosing must be individualized according to the patient's renal function status. The maximum recommended dose of INVEGA® is 6 mg for patients with mild renal impairment and 3 mg for patients with moderate to severe renal impairment (see Dosing for Special Populations).

**Elderly:** No dosage adjustment is recommended based on age alone. However, dose adjustment may be required because of age-related decreases in creatinine clearance (see Dosing for Special Populations).

**Commonly Observed Adverse Reactions:** The most commonly observed adverse reactions, occurring at an incidence of  $\geq 5\%$  and at least 2 times placebo, were akathisia and extrapyramidal disorder.

**Use with Risperidone:** Concomitant use of paliperidone with risperidone has not been studied. Since paliperidone is the major active metabolite of risperidone, consideration should be given to the additive paliperidone exposure if risperidone is co-administered.

01JN776R2

Rossenu S, Cleton A, Talluri K. Evaluation of the pharmacokinetics of an extended-release formulation of paliperidone and an immediate-release formulation of risperidone. Poster presented at: American Society for Clinical Pharmacology and Therapeutics; March 21-24, 2007; Anaheim, CA.

For information on free or discounted prescription medications, visit [access2wellness.com](http://access2wellness.com) or call 866.317.2775.

**Reference:** 1. Conley R, Gupta SK, Sathyan G. Clinical spectrum of the osmotic-controlled release oral delivery system (OROS), an advanced oral delivery form. *Curr Med Res Opin.* 2006;22(10):1879-1892.

Please see brief summary of full Prescribing Information for INVEGA® on adjacent page.

access2wellness™

# INVEGA®

(paliperidone) Extended-Release Tablets

## Brief Summary

**BEFORE PRESCRIBING INVEGA®, PLEASE SEE FULL PRESCRIBING INFORMATION, INCLUDING BOXED WARNING.**

### **WARNING: INCREASED MORTALITY IN ELDERLY PATIENTS WITH DEMENTIA-RELATED PSYCHOSIS**

Elderly patients with dementia-related psychosis treated with antipsychotic drugs are at an increased risk of death. Analyses of 17 placebo-controlled trials (modal duration of 10 weeks), largely in patients taking atypical antipsychotic drugs, revealed a risk of death in drug-treated patients of between 1.6 to 1.7 times the risk of death in placebo-treated patients. Over the course of a typical 10-week controlled trial, the rate of death in drug-treated patients was about 4.5%, compared to a rate of about 2.6% in the placebo group. Although the causes of death were varied, most of the deaths appeared to be either cardiovascular (e.g., heart failure, sudden death) or infectious (e.g., pneumonia) in nature. Observational studies suggest that, similar to atypical antipsychotic drugs, treatment with conventional antipsychotic drugs may increase mortality. The extent to which the findings of increased mortality in observational studies may be attributed to the antipsychotic drug as opposed to some characteristic(s) of the patients is not clear. INVEGA® (paliperidone) Extended-Release Tablets is not approved for the treatment of patients with dementia-related psychosis. [see Warnings and Precautions]

INVEGA® (paliperidone) Extended-Release Tablets are indicated for the acute and maintenance treatment of schizophrenia [see Clinical Studies (14) in full PI].

## CONTRAINDICATIONS

Hypersensitivity reactions, including anaphylactic reactions and angioedema, have been observed in patients treated with risperidone and paliperidone. INVEGA® (paliperidone) is a metabolite of risperidone and is therefore contraindicated in patients with a known hypersensitivity to either paliperidone or risperidone, or to any of the excipients in INVEGA®.

## WARNINGS AND PRECAUTIONS

**Increased Mortality in Elderly Patients with Dementia-Related Psychosis:** Elderly patients with dementia-related psychosis treated with antipsychotic drugs are at an increased risk of death. INVEGA® (paliperidone) is not approved for the treatment of dementia-related psychosis [see Boxed Warning].

**Cerebrovascular Adverse Reactions, Including Stroke, in Elderly Patients With Dementia-Related Psychosis:** In placebo-controlled trials with risperidone, aripiprazole, and olanzapine in elderly subjects with dementia, there was a higher incidence of cerebrovascular adverse reactions (cerebrovascular accidents and transient ischemic attacks) including fatalities compared to placebo-treated subjects. INVEGA® was not marketed at the time these studies were performed. INVEGA® is not approved for the treatment of patients with dementia-related psychosis [see also Boxed Warning and Warnings and Precautions].

**Neuroleptic Malignant Syndrome:** A potentially fatal symptom complex sometimes referred to as Neuroleptic Malignant Syndrome (NMS) has been reported in association with antipsychotic drugs, including paliperidone. Clinical manifestations of NMS are hyperpyrexia, muscle rigidity, altered mental status, and evidence of autonomic instability (irregular pulse or blood pressure, tachycardia, diaphoresis, and cardiac dysrhythmia). Additional signs may include elevated creatine phosphokinase, myoglobinuria (rhabdomyolysis), and acute renal failure.

The diagnostic evaluation of patients with this syndrome is complicated. In arriving at a diagnosis, it is important to identify cases in which the clinical presentation includes both serious medical illness (e.g., pneumonia, systemic infection, etc.) and untreated or inadequately treated extrapyramidal signs and symptoms (EPS). Other important considerations in the differential diagnosis include central anticholinergic toxicity, heat stroke, drug fever, and primary central nervous system pathology.

The management of NMS should include: (1) immediate discontinuation of antipsychotic drugs and other drugs not essential to concurrent therapy; (2) intensive symptomatic treatment and medical monitoring; and (3) treatment of any concomitant serious medical problems for which specific treatments are available. There is no general agreement about specific pharmacological treatment regimens for uncomplicated NMS.

If a patient appears to require antipsychotic drug treatment after recovery from NMS, reintroduction of drug therapy should be closely monitored, since recurrences of NMS have been reported.

**QT Prolongation:** Paliperidone causes a modest increase in the corrected QT (QTc) interval. The use of paliperidone should be avoided in combination with other drugs that are known to prolong QTc including Class 1A (e.g., quinidine, procainamide) or Class III (e.g., amiodarone, sotalol) antiarrhythmic medications, antipsychotic medications (e.g., chlorpromazine, thioridazine), antibiotics (e.g., gatifloxacin, moxifloxacin), or any other class of medications

## INVEGA® (paliperidone) Extended-Release Tablets

known to prolong the QTc interval. Paliperidone should also be avoided in patients with congenital long QT syndrome and in patients with a history of cardiac arrhythmias.

Certain circumstances may increase the risk of the occurrence of torsades de pointes and/or sudden death in association with the use of drugs that prolong the QTc interval, including (1) bradycardia; (2) hypokalemia or hypomagnesemia; (3) concomitant use of other drugs that prolong the QTc interval; and (4) presence of congenital prolongation of the QT interval.

The effects of paliperidone on the QT interval were evaluated in a double-blind, active-controlled (moxifloxacin 400 mg single dose), multicenter QT study in adults with schizophrenia and schizoaffective disorder, and in three placebo- and active-controlled 6-week, fixed-dose efficacy trials in adults with schizophrenia.

In the QT study (n = 141), the 8 mg dose of immediate-release oral paliperidone (n=50) showed a mean placebo-subtracted increase from baseline in QTcLD of 12.3 msec (90% CI: 8.9; 15.6) on day 8 at 1.5 hours post-dose. The mean steady-state peak plasma concentration for this 8 mg dose of paliperidone immediate-release was more than twice the exposure observed with the maximum recommended 12 mg dose of INVEGA® (C<sub>max</sub> ss = 113 ng/mL and 45 ng/mL, respectively, when administered with a standard breakfast). In this same study, a 4 mg dose of the immediate-release oral formulation of paliperidone, for which C<sub>max</sub> ss = 35 ng/mL, showed an increased placebo-subtracted QTcLD of 6.8 msec (90% CI: 3.6; 10.1) on day 2 at 1.5 hours post-dose. None of the subjects had a change exceeding 60 msec or a QTcLD exceeding 500 msec at any time during this study.

For the three fixed-dose efficacy studies, electrocardiogram (ECG) measurements taken at various time points showed only one subject in the INVEGA® 12 mg group had a change exceeding 60 msec on one time-point on Day 6 (increase of 62 msec). No subject receiving INVEGA® had a QTcLD exceeding 500 msec at any time in any of these three studies.

**Tardive Dyskinesia:** A syndrome of potentially irreversible, involuntary, dyskinetic movements may develop in patients treated with antipsychotic drugs. Although the prevalence of the syndrome appears to be highest among the elderly, especially elderly women, it is impossible to predict which patients will develop the syndrome. Whether antipsychotic drug products differ in their potential to cause tardive dyskinesia is unknown.

The risk of developing tardive dyskinesia and the likelihood that it will become irreversible appear to increase as the duration of treatment and the total cumulative dose of antipsychotic drugs administered to the patient increase, but the syndrome can develop after relatively brief treatment periods at low doses, although this is uncommon.

There is no known treatment for established tardive dyskinesia, although the syndrome may remit, partially or completely, if antipsychotic treatment is withdrawn. Antipsychotic treatment itself may suppress (or partially suppress) the signs and symptoms of the syndrome and may thus mask the underlying process. The effect of symptomatic suppression on the long-term course of the syndrome is unknown.

Given these considerations, INVEGA® should be prescribed in a manner that is most likely to minimize the occurrence of tardive dyskinesia. Chronic antipsychotic treatment should generally be reserved for patients who suffer from a chronic illness that is known to respond to antipsychotic drugs. In patients who do require chronic treatment, the smallest dose and the shortest duration of treatment producing a satisfactory clinical response should be sought. The need for continued treatment should be reassessed periodically.

If signs and symptoms of tardive dyskinesia appear in a patient treated with INVEGA®, drug discontinuation should be considered. However, some patients may require treatment with INVEGA® despite the presence of the syndrome.

**Hyperglycemia and Diabetes Mellitus:** Hyperglycemia, in some cases extreme and associated with ketoacidosis or hyperosmolar coma or death, has been reported in patients treated with all atypical antipsychotics. These cases were, for the most part, seen in post-marketing clinical use and epidemiologic studies, not in clinical trials, and there have been few reports of hyperglycemia or diabetes in trial subjects treated with INVEGA®. Assessment of the relationship between atypical antipsychotic use and glucose abnormalities is complicated by the possibility of an increased background risk of diabetes mellitus in patients with schizophrenia and the increasing incidence of diabetes mellitus in the general population. Given these confounders, the relationship between atypical antipsychotic use and hyperglycemia-related adverse events is not completely understood. However, epidemiological studies suggest an increased risk of treatment-emergent hyperglycemia-related adverse events in patients treated with the atypical antipsychotics. Because INVEGA® was not marketed at the time these studies were performed, it is not known if INVEGA® is associated with this increased risk.

Patients with an established diagnosis of diabetes mellitus who are started on atypical antipsychotics should be monitored regularly for worsening of glucose control. Patients with risk factors for diabetes mellitus (e.g., obesity, family history of diabetes) who are starting treatment with atypical

antipsychotics should undergo fasting blood glucose testing at the beginning of treatment and periodically during treatment. Any patient treated with atypical antipsychotics should be monitored for symptoms of hyperglycemia including polydipsia, polyuria, polyphagia, and weakness. Patients who develop symptoms of hyperglycemia during treatment with atypical antipsychotics should undergo fasting blood glucose testing. In some cases, hyperglycemia has resolved when the atypical antipsychotic was discontinued; however, some patients required continuation of anti-diabetic treatment despite discontinuation of the suspect drug.

**Hyperprolactinemia:** Like other drugs that antagonize dopamine D<sub>2</sub> receptors, paliperidone elevates prolactin levels and the elevation persists during chronic administration. Paliperidone has a prolactin-elevating effect similar to that seen with risperidone, a drug that is associated with higher levels of prolactin than other antipsychotic drugs.

Hyperprolactinemia, regardless of etiology, may suppress hypothalamic GnRH, resulting in reduced pituitary gonadotrophin secretion. This, in turn, may inhibit reproductive function by impairing gonadal steroidogenesis in both female and male patients. Galactorrhea, amenorrhea, gynecomastia, and impotence have been reported in patients receiving prolactin-elevating compounds. Long-standing hyperprolactinemia when associated with hypogonadism may lead to decreased bone density in both female and male subjects.

Tissue culture experiments indicate that approximately one-third of human breast cancers are prolactin dependent *in vitro*, a factor of potential importance if the prescription of these drugs is considered in a patient with previously detected breast cancer. An increase in the incidence of pituitary gland, mammary gland, and pancreatic islet cell neoplasia (mammary adenocarcinomas, pituitary and pancreatic adenomas) was observed in the risperidone carcinogenicity studies conducted in mice and rats [see *Nonclinical Toxicology (13.1) in full PI*]. Neither clinical studies nor epidemiologic studies conducted to date have shown an association between chronic administration of this class of drugs and tumorigenesis in humans, but the available evidence is too limited to be conclusive.

**Potential for Gastrointestinal Obstruction:** Because the INVEGA® tablet is non-deformable and does not appreciably change in shape in the gastrointestinal tract, INVEGA® should ordinarily not be administered to patients with pre-existing severe gastrointestinal narrowing (pathologic or iatrogenic, for example: esophageal motility disorders, small bowel inflammatory disease, "short gut" syndrome due to adhesions or decreased transit time, past history of peritonitis, cystic fibrosis, chronic intestinal pseudoobstruction, or Meckel's diverticulum). There have been rare reports of obstructive symptoms in patients with known strictures in association with the ingestion of drugs in non-deformable controlled-release formulations. Because of the controlled-release design of the tablet, INVEGA® should only be used in patients who are able to swallow the tablet whole [see *Dosage and Administration (2.2) and Patient Counseling Information (17.8) in full PI*].

A decrease in transit time, e.g., as seen with diarrhea, would be expected to decrease bioavailability and an increase in transit time, e.g., as seen with gastrointestinal neuropathy, diabetic gastroparesis, or other causes, would be expected to increase bioavailability. These changes in bioavailability are more likely when the changes in transit time occur in the upper GI tract.

**Orthostatic Hypotension and Syncope:** Paliperidone can induce orthostatic hypotension and syncope in some patients because of its alpha-blocking activity. In pooled results of the three placebo-controlled, 6-week, fixed-dose trials, syncope was reported in 0.8% (7/850) of subjects treated with INVEGA® (3 mg, 6 mg, 9 mg, 12 mg) compared to 0.3% (1/355) of subjects treated with placebo. INVEGA® should be used with caution in patients with known cardiovascular disease (e.g., heart failure, history of myocardial infarction or ischemia, conduction abnormalities), cerebrovascular disease, or conditions that predispose the patient to hypotension (e.g., dehydration, hypovolemia, and treatment with antihypertensive medications). Monitoring of orthostatic vital signs should be considered in patients who are vulnerable to hypotension.

**Potential for Cognitive and Motor Impairment:** Somnolence and sedation were reported in subjects treated with INVEGA® [see *Adverse Reactions*]. Antipsychotics, including INVEGA®, have the potential to impair judgment, thinking, or motor skills. Patients should be cautioned about performing activities requiring mental alertness, such as operating hazardous machinery or operating a motor vehicle, until they are reasonably certain that paliperidone therapy does not adversely affect them.

**Seizures:** During premarketing clinical trials (the three placebo-controlled, 6-week, fixed-dose studies and a study conducted in elderly schizophrenic subjects), seizures occurred in 0.22% of subjects treated with INVEGA® (3 mg, 6 mg, 9 mg, 12 mg) and 0.25% of subjects treated with placebo. Like other antipsychotic drugs, INVEGA® should be used cautiously in patients with a history of seizures or other conditions that potentially lower the seizure threshold. Conditions that lower the seizure threshold may be more prevalent in patients 65 years or older.

**Dysphagia:** Esophageal dysmotility and aspiration have been associated with antipsychotic drug use. Aspiration pneumonia is a common cause of morbidity and mortality in patients with advanced Alzheimer's dementia. INVEGA® and other antipsychotic drugs should be used cautiously in patients at risk for aspiration pneumonia.

**Suicide:** The possibility of suicide attempt is inherent in psychotic illnesses, and close supervision of high-risk patients should accompany drug therapy. Prescriptions for INVEGA® should be written for the smallest quantity of tablets consistent with good patient management in order to reduce the risk of overdose.

**Priapism:** Drugs with alpha-adrenergic blocking effects have been reported to induce priapism. Priapism has been reported with INVEGA® during postmarketing surveillance. Severe priapism may require surgical intervention.

**Thrombotic Thrombocytopenic Purpura (TTP):** No cases of TTP were observed during clinical studies with paliperidone. Although cases of TTP have been reported in association with risperidone administration, the relationship to risperidone therapy is unknown.

**Body Temperature Regulation:** Disruption of the body's ability to reduce core body temperature has been attributed to antipsychotic agents. Appropriate care is advised when prescribing INVEGA® to patients who will be experiencing conditions which may contribute to an elevation in core body temperature, e.g., exercising strenuously, exposure to extreme heat, receiving concomitant medication with anticholinergic activity, or being subject to dehydration.

**Antiemetic Effect:** An antiemetic effect was observed in preclinical studies with paliperidone. This effect, if it occurs in humans, may mask the signs and symptoms of overdose with certain drugs or of conditions such as intestinal obstruction, Reye's syndrome, and brain tumor.

**Use in Patients with Concomitant Illness:** Clinical experience with INVEGA® in patients with certain concomitant illnesses is limited [see *Clinical Pharmacology (12.3) in full PI*].

Patients with Parkinson's Disease or Dementia with Lewy Bodies are reported to have an increased sensitivity to antipsychotic medication. Manifestations of this increased sensitivity include confusion, obtundation, postural instability with frequent falls, extrapyramidal symptoms, and clinical features consistent with the neuroleptic malignant syndrome.

INVEGA® has not been evaluated or used to any appreciable extent in patients with a recent history of myocardial infarction or unstable heart disease. Patients with these diagnoses were excluded from premarketing clinical trials. Because of the risk of orthostatic hypotension with INVEGA®, caution should be observed in patients with known cardiovascular disease [see *Warnings and Precautions*].

**Monitoring: Laboratory Tests:** No specific laboratory tests are recommended.

## ADVERSE REACTIONS

The following are discussed in more detail in other sections of the labeling:

- Increased mortality in elderly patients with dementia-related psychosis [see *Boxed Warning and Warnings and Precautions*]
- Cerebrovascular adverse events, including stroke, in elderly patients with dementia-related psychosis [see *Warnings and Precautions*]
- Neuroleptic malignant syndrome [see *Warnings and Precautions*]
- QT prolongation [see *Warnings and Precautions*]
- Tardive dyskinesia [see *Warnings and Precautions*]
- Hyperglycemia and diabetes mellitus [see *Warnings and Precautions*]
- Hyperprolactinemia [see *Warnings and Precautions*]
- Potential for Gastrointestinal Obstruction [see *Warnings and Precautions*]
- Orthostatic hypotension and syncope [see *Warnings and Precautions*]
- Potential for cognitive and motor impairment [see *Warnings and Precautions*]
- Seizures [see *Warnings and Precautions*]
- Dysphagia [see *Warnings and Precautions*]
- Suicide [see *Warnings and Precautions*]
- Priapism [see *Warnings and Precautions*]
- Thrombotic thrombocytopenic purpura (TTP) [see *Warnings and Precautions*]
- Disruption of body temperature regulation [see *Warnings and Precautions*]
- Antiemetic effect [see *Warnings and Precautions*]
- Increased sensitivity in patients with Parkinson's disease or those with dementia with Lewy bodies [see *Warnings and Precautions*]
- Diseases or conditions that could affect metabolism or hemodynamic responses [see *Warnings and Precautions*]

The most common adverse reactions in clinical trials (reported in 5% or more of subjects treated with INVEGA® and at least twice the placebo rate in any of the dose groups) were akathisia and extrapyramidal disorder.

The most common adverse reactions that were associated with discontinuation from clinical trials (causing discontinuation in 2% of INVEGA®-treated subjects) were nervous system disorders [see *Adverse Reactions*].

The safety of INVEGA® was evaluated in 1205 adult subjects with schizophrenia who participated in three placebo-controlled, 6-week, double-blind trials, of whom 850 subjects received INVEGA® at fixed doses ranging from 3 mg to 12 mg once daily. The information presented in this section was derived from pooled data from these three trials. Additional safety information from the placebo-controlled phase of the long-term maintenance study, in which subjects received INVEGA® at daily doses within the range of 3 mg to 15 mg (n=104), is also included.

Adverse events during exposure to study treatment were obtained by general inquiry and recorded by clinical investigators using their own terminology. Consequently, to provide a meaningful estimate of the proportion of individuals experiencing adverse events, events were grouped in standardized categories using MedDRA terminology.

Throughout this section, adverse reactions are reported. Adverse reactions are adverse events that were considered to be reasonably associated with the use of INVEGA® (adverse drug reactions) based on the comprehensive assessment of the available adverse event information. A causal association for INVEGA® often cannot be reliably established in individual cases. Further, because clinical trials are conducted under widely varying conditions, adverse reaction rates observed in the clinical trials of a drug cannot be directly compared to rates in the clinical trials of another drug and may not reflect the rates observed in clinical practice.

**Commonly-Observed Adverse Reactions in Double-Blind, Placebo-Controlled Clinical Trials:** Table 1 enumerates the pooled incidences of adverse reactions reported in the three placebo-controlled, 6-week, fixed-dose studies, listing those that occurred in 2% or more of subjects treated with INVEGA® in any of the dose groups, and for which the incidence in INVEGA®-treated subjects in any of the dose groups was greater than the incidence in subjects treated with placebo.

**Table 1. Adverse Reactions in Short-Term, Fixed-Dose, Placebo-Controlled Trials in Adult Subjects with Schizophrenia\*:** Body System or Organ Class Dictionary-derived Term followed by Percent of Patients Reporting Event Placebo (N=355) first, INVEGA® 3 mg once daily (N=127) second, 6 mg once daily (N=235) third, 9 mg once daily (N=246) fourth, 12 mg once daily (N=242) fifth: **Total percentage of subjects with adverse reactions** 37, 48, 47, 54, 60; **Cardiac disorders:** Atrioventricular block first degree 1, 2, 0, 2, 1; Bundle branch block 2, 3, 1, 3, <1; Sinus arrhythmia 0, 2, 1, 1, <1; Tachycardia 7, 14, 12, 12, 14; **Gastrointestinal disorders:** Abdominal pain upper 1, 1, 3, 2, 2; Dry mouth 1, 2, 3, 1, 3; Salivary hypersecretion <1, 0, <1, 1, 4; **General disorders:** Asthenia 1, 2, <1, 2, 2; Fatigue 1, 2, 1, 2, 2; **Nervous system disorders:** Akathisia 4, 4, 3, 8, 10; Dizziness 4, 6, 5, 4, 5; Dystonia 1, 1, 1, 5, 4; Extrapyramidal disorder 2, 5, 2, 7, 7; Headache 12, 11, 12, 14, 14; Hypertonia 1, 2, 1, 4, 3; Parkinsonism 0, 0, <1, 2, 1; Somnolence 7, 6, 9, 10, 11; Tremor 3, 3, 3, 4, 3; **Vascular disorders:** Orthostatic hypotension 1, 2, 1, 2, 4. \*Table includes adverse reactions that were reported in 2% or more of subjects in any of the INVEGA® dose groups and which occurred at greater incidence than in the placebo group. Data are pooled from three studies; one study included once-daily INVEGA® doses of 3 mg and 9 mg, the second study included 6 mg, 9 mg, and 12 mg, and the third study included 6 mg and 12 mg [see Clinical Studies (14) in full PI]. Adverse reactions for which the INVEGA® incidence was equal to or less than placebo are not listed in the table, but included the following: vomiting.

**Less Commonly-Observed Adverse Reactions:** The following list contains all serious and non-serious adverse reactions reported at any time by individuals taking INVEGA® during any phase of a trial within the premarketing database (n = 2720), except (1) those listed in Table 1 above or elsewhere in labeling, (2) those for which a causal relationship to INVEGA® use was considered remote, and (3) those occurring in only one subject treated with INVEGA® and that were not acutely life-threatening.

**Cardiac disorders:** bradycardia, palpitations

**Gastrointestinal disorders:** abdominal pain, swollen tongue

**General disorders:** edema

**Immune system disorders:** anaphylactic reaction

**Vascular disorders:** ischemia

**Discontinuations Due to Adverse Reactions:** The percentages of subjects who discontinued due to adverse reactions in the three placebo-controlled, 6-week, fixed-dose studies were 3% and 1% in INVEGA®- and placebo-treated subjects, respectively. The most common reasons for discontinuation were nervous system disorders (2% and 0% in INVEGA®- and placebo-treated subjects, respectively).

**Dose-Related Adverse Reactions:** Based on the pooled data from the three placebo-controlled, 6-week, fixed-dose studies, among the adverse reactions that occurred with a greater than 2% incidence in the subjects treated with INVEGA®, the incidences of the following adverse reactions increased with dose: somnolence, orthostatic hypotension, akathisia, dystonia, extrapyramidal disorder, hypertonia, Parkinsonism, and salivary hypersecretion. For most of these, the increased incidence was seen primarily at the 12 mg dose, and, in some cases, the 9 mg dose.

**Demographic Differences:** An examination of population subgroups in the three placebo-controlled, 6-week, fixed-dose studies did not reveal any evidence of differences in safety on the basis of gender or race alone; there was also no difference on the basis of age [see Use in Specific Populations].

**Extrapyramidal Symptoms (EPS):** Pooled data from the three placebo-controlled, 6-week, fixed-dose studies provided information regarding treatment-emergent EPS. Several methods were used to measure EPS: (1) the Simpson-Angus global score (mean change from baseline) which broadly evaluates Parkinsonism, (2) the Barnes Akathisia Rating Scale global clinical rating score (mean change from baseline) which evaluates akathisia, (3) use of anticholinergic medications to treat emergent EPS (Table 2), and (4) incidence of spontaneous reports of EPS (Table 3). For the Simpson-Angus Scale, spontaneous EPS reports and use of anticholinergic medications, there was a dose-related increase observed for the 9 mg and 12 mg doses. There was no difference observed between placebo and INVEGA® 3 mg and 6 mg doses for any of these EPS measures.

**Table 2. Treatment-Emergent Extrapyramidal Symptoms (EPS) Assessed by Incidence of Ratings Scales and Use of Anticholinergic Medication:** EPS Group followed by Percentage of Patients Placebo (N=355) first, INVEGA® 3 mg once daily (N=127) second, 6 mg once daily (N=235) third, 9 mg once daily (N=246) fourth, 12 mg once daily (N=242) fifth, Parkinsonism<sup>a</sup> 9, 11, 3, 15, 14; Akathisia<sup>b</sup> 6, 6, 4, 7, 9; Use of anticholinergic medications<sup>c</sup> 10, 10, 9, 22, 22. a: For Parkinsonism, percent of patients with Simpson-Angus global score > 0.3 (Global score defined as total sum of items score divided by the number of items), b: For Akathisia, percent of patients with Barnes Akathisia Rating Scale global score ≥ 2, c: Percent of patients who received anticholinergic medications to treat emergent EPS

**Table 3. Treatment-Emergent Extrapyramidal Symptoms (EPS)-Related Adverse Events by MedDRA Preferred Term:** EPS Group followed by Percentage of Patients Placebo (N=355) first, INVEGA® 3 mg once daily (N=127) second, 6 mg once daily (N=235) third, 9 mg once daily (N=246) fourth, 12 mg once daily (N=242) fifth, Overall percentage of patients with EPS-related AE 11, 13, 10, 25, 26; Dyskinesia 3, 5, 3, 8, 9; Dystonia 1, 1, 1, 5, 5; Hyperkinesia 4, 4, 3, 8, 10; Parkinsonism 2, 3, 7, 6; Tremor 3, 3, 3, 4, 3; Dyskinesia group includes: Dyskinesia, extrapyramidal disorder, muscle twitching, tardive dyskinesia Dystonia group includes: Dystonia, muscle spasms, oculogyration, trismus Hyperkinesia group includes: Akathisia, hyperkinesia Parkinsonism group includes: Bradykinesia, cogwheel rigidity, drooling, hypertonia, hypokinesia, muscle rigidity, musculoskeletal stiffness, parkinsonism Tremor group includes: Tremor

**Laboratory Test Abnormalities:** In the pooled data from the three placebo-controlled, 6-week, fixed-dose studies, a between-group comparison revealed no medically important differences between INVEGA® and placebo in the proportions of subjects experiencing potentially clinically significant changes in routine serum chemistry, hematology, or urinalysis parameters. Similarly, there were no differences between INVEGA® and placebo in the incidence of discontinuations due to changes in hematology, urinalysis, or serum chemistry, including mean changes from baseline in fasting glucose, insulin, c-peptide, triglyceride, HDL, LDL, and total cholesterol measurements. However, INVEGA® was associated with increases in serum prolactin [see Warnings and Precautions].

**Weight Gain:** In the pooled data from the three placebo-controlled, 6-week, fixed-dose studies, the proportions of subjects meeting a weight gain criterion of ≥ 7% of body weight were compared, revealing a similar incidence of weight gain for INVEGA® 3 mg and 6 mg (7% and 6%, respectively) compared with placebo (5%), and a higher incidence of weight gain for INVEGA® 9 mg and 12 mg (9% and 9%, respectively).

**Other Findings Observed During Clinical Trials:** The safety of INVEGA® was also evaluated in a long-term trial designed to assess the maintenance of effect with INVEGA® in adults with schizophrenia [see Clinical Studies (14) in full PI]. In general, adverse reaction types, frequencies, and severities during the initial 14-week open-label phase of this study were comparable to those observed in the 6-week, placebo-controlled, fixed-dose studies. Adverse reactions reported during the long-term double-blind phase of this study were similar in type and severity to those observed in the initial 14-week open-label phase.

**Postmarketing Experience:** The following adverse reaction has been identified during postapproval use of INVEGA®; because this reaction was reported voluntarily from a population of uncertain size, it is not possible to reliably estimate its frequency: priapism.

**Adverse Reactions Reported With Risperidone:** Paliperidone is the major active metabolite of risperidone. Adverse reactions reported with risperidone can be found in the ADVERSE REACTIONS section of the risperidone package insert.

## DRUG INTERACTIONS

**Potential for INVEGA® to Affect Other Drugs:** Given the primary CNS effects of paliperidone [see Adverse Reactions], INVEGA® should be used with caution in combination with other centrally acting drugs and alcohol. Paliperidone may antagonize the effect of levodopa and other dopamine agonists.



Because of its potential for inducing orthostatic hypotension, an additive effect may be observed when INVEGA® is administered with other therapeutic agents that have this potential [see *Warnings and Precautions*].

Paliperidone is not expected to cause clinically important pharmacokinetic interactions with drugs that are metabolized by cytochrome P450 isozymes. *In vitro* studies in human liver microsomes showed that paliperidone does not substantially inhibit the metabolism of drugs metabolized by cytochrome P450 isozymes, including CYP1A2, CYP2A6, CYP2C8/9/10, CYP2D6, CYP2E1, CYP3A4, and CYP3A5. Therefore, paliperidone is not expected to inhibit clearance of drugs that are metabolized by these metabolic pathways in a clinically relevant manner. Paliperidone is also not expected to have enzyme inducing properties.

Paliperidone is a weak inhibitor of P-glycoprotein (P-gp) at high concentrations. No *in vivo* data are available and the clinical relevance is unknown.

**Potential for Other Drugs to Affect INVEGA®:** Paliperidone is not a substrate of CYP1A2, CYP2A6, CYP2C9, and CYP2C19, so that an interaction with inhibitors or inducers of these isozymes is unlikely. While *in vitro* studies indicate that CYP2D6 and CYP3A4 may be minimally involved in paliperidone metabolism, *in vivo* studies do not show decreased elimination by these isozymes and they contribute to only a small fraction of total body clearance. *In vitro* studies have shown that paliperidone is a P-gp substrate.

Co-administration of INVEGA® 6 mg once daily with carbamazepine 200 mg twice daily caused a decrease of approximately 37% in the mean steady-state C<sub>max</sub> and AUC of paliperidone. This decrease is caused, to a substantial degree, by a 35% increase in renal clearance of paliperidone. A minor decrease in the amount of drug excreted unchanged in the urine suggests that there was little effect on the CYP metabolism or bioavailability of paliperidone during carbamazepine co-administration. On initiation of carbamazepine, the dose of INVEGA® should be re-evaluated and increased if necessary. Conversely, on discontinuation of carbamazepine, the dose of INVEGA® should be re-evaluated and decreased if necessary.

Paliperidone is metabolized to a limited extent by CYP2D6 [see *Clinical Pharmacology (12.3) in full PI*]. In an interaction study in healthy subjects in which a single 3 mg dose of INVEGA® was administered concomitantly with 20 mg per day of paroxetine (a potent CYP2D6 inhibitor), paliperidone exposures were on average 16% (90% CI: 4, 30) higher in CYP2D6 extensive metabolizers. Higher doses of paroxetine have not been studied. The clinical relevance is unknown.

#### USE IN SPECIFIC POPULATIONS

**Pregnancy:** Pregnancy Category C: There are no adequate and well controlled studies of INVEGA® in pregnant women. INVEGA® should be used during pregnancy only if the potential benefit justifies the potential risk to the fetus.

Use of first generation antipsychotic drugs during the last trimester of pregnancy has been associated with extrapyramidal symptoms in the neonate. These symptoms are usually self-limited. It is not known whether paliperidone, when taken near the end of pregnancy, will lead to similar neonatal signs and symptoms.

In animal reproduction studies, there were no increases in fetal abnormalities when pregnant rats and rabbits were treated during the period of organogenesis with up to 8 times the maximum recommended human dose of paliperidone (on a mg/m<sup>2</sup> basis).

In rat reproduction studies with risperidone, which is extensively converted to paliperidone in rats and humans, there were increases in pup deaths seen at oral doses which are less than the maximum recommended human dose of risperidone on a mg/m<sup>2</sup> basis (see risperidone package insert).

**Labor and Delivery:** The effect of INVEGA® on labor and delivery in humans is unknown.

**Nursing Mothers:** Paliperidone is 9-hydroxyrisperidone, the active metabolite of risperidone. In animal studies, risperidone and 9-hydroxyrisperidone were excreted in milk. Risperidone and 9-hydroxyrisperidone are also excreted in human breast milk. Caution should be exercised when INVEGA® is administered to a nursing woman. The known benefits of breastfeeding should be weighed against the unknown risks of infant exposure to paliperidone.

**Pediatric Use:** Safety and effectiveness of INVEGA® in patients < 18 years of age have not been established.

**Geriatric Use:** The safety, tolerability, and efficacy of INVEGA® were evaluated in a 6-week placebo-controlled study of 114 elderly subjects with schizophrenia (65 years of age and older, of whom 21 were 75 years of age and older). In this study, subjects received flexible doses of INVEGA® (3 mg to 12 mg once daily). In addition, a small number of subjects 65 years of age and older were included in the 6-week placebo-controlled studies in which adult schizophrenic subjects received fixed doses of INVEGA® (3 mg to 15 mg once daily) [see *Clinical Studies (14) in full PI*].

Overall, of the total number of subjects in clinical studies of INVEGA® (n = 1796), including those who received INVEGA® or placebo, 125 (7.0%) were 65 years of age and older and 22 (1.2%) were 75 years of age and older. No overall differences in safety or effectiveness were observed between these

subjects and younger subjects, and other reported clinical experience has not identified differences in response between the elderly and younger patients, but greater sensitivity of some older individuals cannot be ruled out.

This drug is known to be substantially excreted by the kidney and clearance is decreased in patients with moderate to severe renal impairment [see *Clinical Pharmacology (12.3) in full PI*], who should be given reduced doses. Because elderly patients are more likely to have decreased renal function, care should be taken in dose selection, and it may be useful to monitor renal function [see *Dosage and Administration (2.4) in full PI*].

**Renal Impairment:** Dosing must be individualized according to the patient's renal function status [see *Dosage and Administration (2.4) in full PI*].

**Hepatic Impairment:** No dosage adjustment is required in patients with mild to moderate hepatic impairment. INVEGA® has not been studied in patients with severe hepatic impairment.

#### PATIENT COUNSELING INFORMATION

Physicians are advised to discuss the following issues with patients for whom they prescribe INVEGA®.

**Orthostatic Hypotension:** Patients should be advised that there is risk of orthostatic hypotension, particularly at the time of initiating treatment, re-initiating treatment, or increasing the dose [see *Warnings and Precautions*].

**Interference with Cognitive and Motor Performance:** As INVEGA® has the potential to impair judgment, thinking, or motor skills, patients should be cautioned about operating hazardous machinery, including automobiles, until they are reasonably certain that INVEGA® therapy does not affect them adversely [see *Warnings and Precautions*].

**Pregnancy:** Patients should be advised to notify their physician if they become pregnant or intend to become pregnant during treatment with INVEGA® [see *Use in Specific Populations*].

**Nursing:** Caution should be exercised when INVEGA® is administered to a nursing woman. The known benefits of breastfeeding should be weighed against the unknown risks of infant exposure to paliperidone. [See *Use in Specific Populations*].

**Concomitant Medication:** Patients should be advised to inform their physicians if they are taking, or plan to take, any prescription or over-the-counter drugs, as there is a potential for interactions [see *Drug Interactions*].

**Alcohol:** Patients should be advised to avoid alcohol while taking INVEGA® [see *Drug Interactions*].

**Heat Exposure and Dehydration:** Patients should be advised regarding appropriate care in avoiding overheating and dehydration [see *Warnings and Precautions*].

**Administration:** Patients should be informed that INVEGA® should be swallowed whole with the aid of liquids. Tablets should not be chewed, divided, or crushed. The medication is contained within a nonabsorbable shell designed to release the drug at a controlled rate. The tablet shell, along with insoluble core components, is eliminated from the body; patients should not be concerned if they occasionally notice something that looks like a tablet in their stool [see *Dosage and Administration (2.2) in full PI*].

Manufactured by:

ALZA Corporation

Mountain View, CA 94043

OR

Janssen Cilag Manufacturing, LLC

Gurabo, Puerto Rico 00778

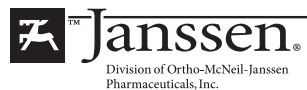

Manufactured for:

Janssen, Division of Ortho-McNeil-Janssen Pharmaceuticals, Inc.

Titusville, NJ 08560

OROS is a registered trademark of ALZA Corporation

©Janssen, Division of Ortho-McNeil-Janssen Pharmaceuticals, Inc. 2007

10105904B

Revised: December 2008

01JN08030BS

LISA, 32\*

Part-time Caterer

Diagnosis: Bipolar Disorder

Recent Episode: Mixed

## SEE ME FOR WHO I CAN BE

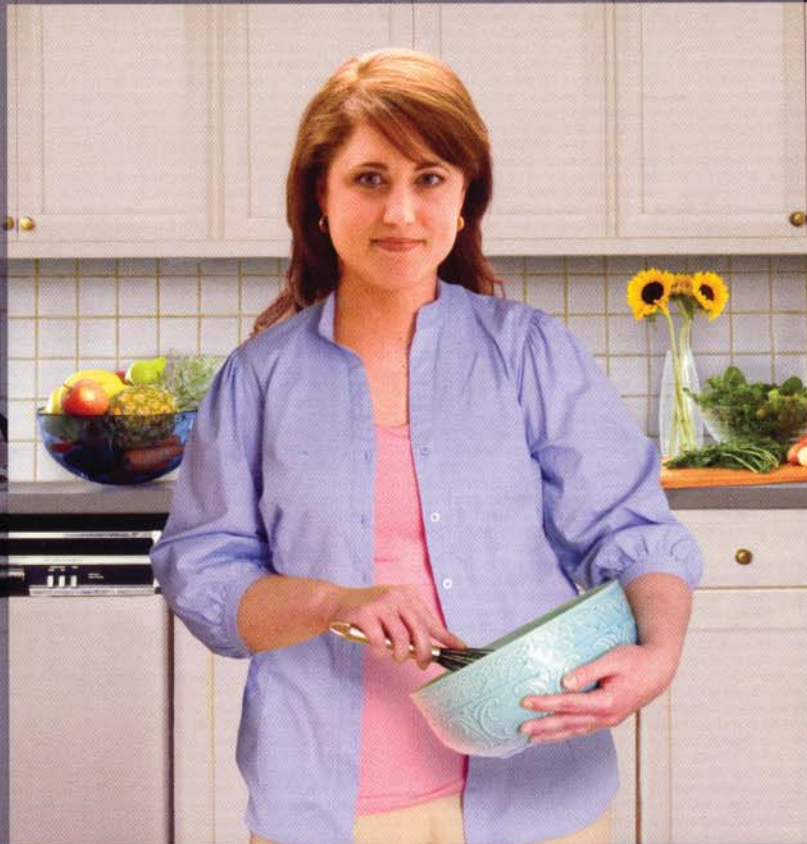

\*Not an actual patient.

### Do you see your patients' full potential?

GEODON is indicated for the treatment of acute manic or mixed episodes associated with bipolar disorder, with or without psychotic symptoms.

**Elderly patients with dementia-related psychosis treated with antipsychotic drugs are at an increased risk of death compared to placebo. GEODON is not approved for the treatment of patients with dementia-related psychosis.**

GEODON is contraindicated in patients with a known history of QT prolongation, recent acute myocardial infarction, or uncompensated heart failure, and should not be used with certain other QT-prolonging drugs. **GEODON has been associated with prolongation of the QT<sub>c</sub> interval. In some drugs, QT prolongation has been associated with torsade de pointes, a potentially fatal arrhythmia. Patients who are at risk for significant electrolyte disturbances should have baseline measurements performed before initiating GEODON. Patients on diuretics should be monitored.**

As with all antipsychotic medications, a rare and potentially fatal condition known as neuroleptic malignant syndrome (NMS) has been reported with GEODON. NMS can cause hyperpyrexia, muscle rigidity, diaphoresis, tachycardia, irregular pulse or blood pressure, cardiac dysrhythmia, and altered mental status. If signs and symptoms appear, immediate discontinuation, treatment, and monitoring are recommended.

Prescribing should be consistent with the need to minimize tardive dyskinesia (TD), a potentially irreversible dose- and duration-dependent syndrome. If signs and symptoms appear, discontinuation should be considered since TD may remit partially or completely.

Hyperglycemia-related adverse events, sometimes serious, have been reported in patients treated with atypical antipsychotics. There have been few reports of hyperglycemia or diabetes in patients treated with GEODON, and it is not known if GEODON is associated with these events. Patients treated with an atypical antipsychotic should be monitored for symptoms of hyperglycemia.

Precautions include the risk of rash, orthostatic hypotension, and seizures.

The most common adverse events associated with GEODON in bipolar mania were somnolence, extrapyramidal symptoms, dizziness, akathisia, and abnormal vision.

*Please see brief summary of prescribing information on adjacent page.*

For more information, please visit [www.pfizerpro.com/GEODON](http://www.pfizerpro.com/GEODON)

**GEODON**<sup>®</sup>  
(ziprasidone HCl) Capsules



# A new US distributor for books from the Royal College of Psychiatrists

## Fish's Clinical Psychopathology Signs and Symptoms in Psychiatry

Third edition

Patricia Casey and Brendan Kelly

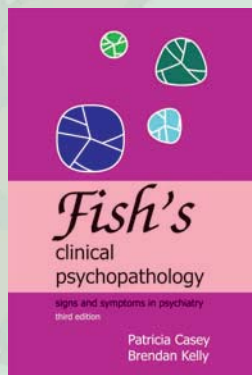

A classic text, this presents concise clinical descriptions and psychopathological insights into the myriad manifestations of disordered psychological function. The third edition has been expanded and modernized to reflect new thinking in psychiatric symptomatology over the past 30 years. It has additional material on: personality disorders; defence mechanisms; cognitive distortions and memory; and unusual psychiatric syndromes.

ISBN 978-1-904671-32-9, paperback, 138 pages, 2007, \$36

## Research Methods in Psychiatry

Third edition

Edited by Chris Freeman and Peter Tyrer

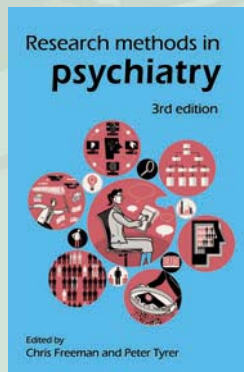

This comprehensive guide to psychiatric research methods takes the reader from getting started through to publishing a paper, with advice on avoiding common pitfalls on the way. Methods discussed include: systematic analysis and meta-analysis; epidemiology; qualitative research; and research focused on a single or few patients. Five new chapters cover topics such as research from the trainee's perspective and research in learning disability and child and adolescent psychiatry.

ISBN 978-1-904671-33-6, paperback, 344 pages, 2006, \$50

## Perinatal Mental Health A Guide to the Edinburgh Postnatal Depression Scale

John Cox and Jeni Holden

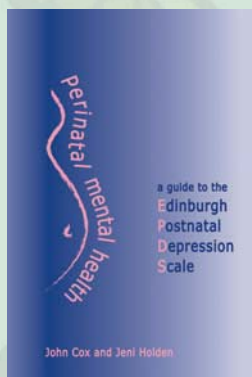

The Edinburgh Postnatal Depression Scale (EPDS) was designed by the authors as a simple means of screening for postnatal depression in health care settings. It can also be used for research purposes. This book guides health professionals and researchers through the practical uses of the EPDS, explores cross-cultural issues, gives background information on postnatal depression and details implications for health service

management. It includes the EPDS questions in 21 different languages.

ISBN 978-1-901242-81-2, paperback, 126 pages, 2003, \$24

## Where There Is No Psychiatrist A Mental Health Care Manual

Vikram Patel

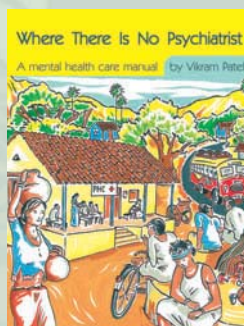

This highly illustrated practical manual is for general and community health workers, particularly in developing countries. Following an introduction to mental illness, the book describes over 30 clinical problems. The reader is guided through their assessment and management using a problem-solving approach. Mental health issues in specific situations are described, including:

in a refugee camp; a school health programme; with people suffering from AIDS; and in mental health promotion. There is quick reference information for common problems and chapters for the reader to personalise the manual for a particular location. There is also a glossary of technical terms and a practical guide to the use of psychiatric medicines and simple psychological treatments.

ISBN 978-1-901242-75-1, paperback, 266 pages, 2003, \$16

## RCPsych Publications titles are now available from:

Publishers Storage and Shipping Company, 46 Development Road, Fitchburg, MA 01420.

Tel: 978 829 2560. Fax: 978 348 1233. Email: [orders@pssc.com](mailto:orders@pssc.com)

Many titles can also be ordered through [www.amazon.com](http://www.amazon.com)

(RCPsych Publications is the name given to books produced by the Royal College of Psychiatrists in the UK. For our full list of over 140 titles see: [www.rcpsych.ac.uk/publications](http://www.rcpsych.ac.uk/publications))

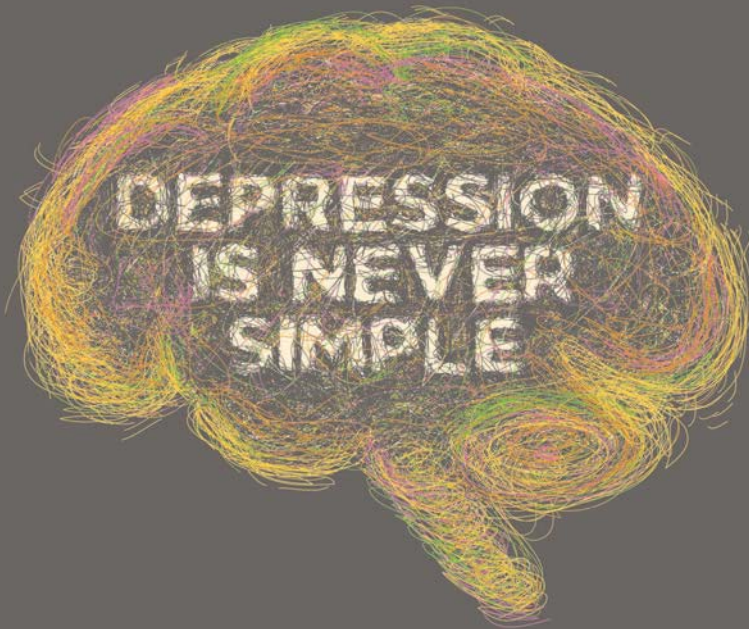

## AVAILABLE NOW: VENLAFAXINE EXTENDED RELEASE TABLETS OFFER A NEW ALTERNATIVE FOR PATIENTS WITH MAJOR DEPRESSIVE DISORDER (MDD)

**Venlafaxine Extended Release Tablets: the only way to prescribe 225 mg of extended-release, once-daily venlafaxine HCl in a single tablet<sup>1</sup>**

- Equal doses of venlafaxine HCl extended-release tablets are bioequivalent to Effxor XR<sup>®</sup> (venlafaxine HCl) extended-release capsules when administered under fed conditions\*
- Venlafaxine Extended Release Tablets are not AB rated to Effxor XR
- A single 225-mg Venlafaxine Extended Release Tablet vs a combination of venlafaxine HCl extended-release capsules may reduce pill burden for patients taking 225 mg for MDD
- MDD patients should start treatment with 75 mg/day (in some patients, 37.5 mg/day for 4 to 7 days, then increased to 75 mg/day); daily dose can be increased by 75 mg/day at intervals of  $\geq 4$  days (maximum 225 mg/day)

For more information, call 1.888.299.1053 or visit [www.VERTablets.com](http://www.VERTablets.com)

\*Venlafaxine Extended Release Tablets are not indicated for the treatment of generalized anxiety disorder or panic disorder.

**Venlafaxine  
Extended Release  
Tablets** (VENLAFAXINE  
HYDROCHLORIDE)  
37.5 mg 75 mg 150 mg 225 mg

### IMPORTANT SAFETY INFORMATION

#### **WARNING: Suicidality and Antidepressants**

**See full Prescribing Information for complete boxed warning.**

**Increased risk of suicidal thinking and behavior has been reported in children, adolescents and young adults taking antidepressants for major depressive disorder (MDD) and other psychiatric disorders. Venlafaxine Extended Release Tablets are not approved for use in pediatric patients.**

Venlafaxine Extended Release Tablets (venlafaxine hydrochloride) are indicated for the treatment of Major Depressive Disorder (MDD) and Social Anxiety Disorder (SAD). Efficacy of venlafaxine HCl was shown in both short-term trials and a longer-term trial in MDD, and in short-term SAD trials. Venlafaxine Extended Release Tablets are contraindicated in patients taking monoamine oxidase inhibitors (MAOIs).

All patients should be monitored appropriately and observed closely for clinical worsening and suicidality, especially at the beginning of drug therapy, or at the time of increases or decreases in dose. Such monitoring should include daily observation by families and caregivers for emergence of agitation, irritability, unusual changes in behavior, or emergence of suicidality.

Venlafaxine Extended Release Tablets should not be used in combination with an MAOI, or within at least 14 days of discontinuing treatment with an MAOI. At least 7 days should be allowed after stopping Venlafaxine Extended Release Tablets before starting an MAOI. The development of a potentially life-threatening

serotonin syndrome may occur with Venlafaxine Extended Release Tablets, particularly if used concomitantly with serotonergic drugs (including SSRIs, SNRIs, and triptans) or with MAO inhibitors.

Treatment with venlafaxine hydrochloride is associated with sustained hypertension in some patients. Regular blood pressure monitoring is recommended. Mydriasis has been reported in association with venlafaxine; therefore, patients with raised intraocular pressure or those at risk of acute narrow-angle glaucoma should be monitored.

Dosing must be individualized according to the patient's hepatic and renal function status. Abrupt discontinuation or dose reduction has been associated with discontinuation symptoms (generally self-limiting; serious symptoms possible). A gradual reduction in the dose rather than abrupt cessation is recommended.

After treatment with venlafaxine hydrochloride, insomnia and nervousness, activation of mania/hypomania, symptomatic hyponatremia, seizures, abnormal bleeding (most commonly ecchymosis), clinically relevant increases in serum cholesterol, interstitial lung disease and eosinophilic pneumonia have been reported. Venlafaxine Extended Release Tablets should be used cautiously in patients with a history of seizures. Measurement of serum cholesterol should be considered during long-term treatment. Patients should be cautioned about the risk of bleeding associated with concomitant use of Venlafaxine Extended Release Tablets and NSAIDs, aspirin, or other drugs that affect coagulation.

Venlafaxine Extended Release Tablets should be used during pregnancy and nursing only if clearly needed due to the potential for serious adverse reactions.

Adverse reactions occurring in short-term studies of major depressive disorder\* were abnormal ejaculation, gastrointestinal complaints (nausea, dry mouth, anorexia), CNS complaints (dizziness, somnolence, abnormal dreams) and sweating. Adverse reactions occurring in short-term studies of social anxiety disorder\* were asthenia, gastrointestinal complaints (anorexia, dry mouth, nausea), CNS complaints (anxiety, insomnia, libido decreased, nervousness, somnolence, dizziness), abnormalities of sexual function (abnormal ejaculation, orgasmic dysfunction, impotence), yawn, sweating, and abnormal vision.

\*Occurring in at least 5% of patients receiving venlafaxine extended release capsules and at a rate at least twice that of placebo.

**Please see brief summary of full Prescribing Information, including complete boxed warning, on adjacent pages.**

**Reference:** 1. Venlafaxine Extended Release Tablets [package insert]. Wilmington, NC: Osmotica Pharmaceutical Corp.; 2008.

Effxor XR is a registered trademark of Wyeth.

For more information, call 1.888.299.1053 or visit [www.VERTablets.com](http://www.VERTablets.com)

©2008 Upstate Pharma, LLC All rights reserved. Printed in USA. TA147-1008

Marketed by: For:

**UPSTATE**  
PHARMA, LLC

**Osmotica**  
Pharmaceutical

**BRIEF SUMMARY.** See package insert for full Prescribing Information. For further product information and current package insert, please visit [www.VERTablets.com](http://www.VERTablets.com) or call our medical communications department toll-free at 1-888-299-1053.

**WARNING: SUICIDALITY AND ANTIDEPRESSANT DRUGS**

Antidepressants increased the risk compared to placebo of suicidal thinking and behavior (suicidality) in children, adolescents, and young adults in short-term studies of Major Depressive Disorder (MDD) and other psychiatric disorders. Anyone considering the use of Venlafaxine Extended Release Tablets or any other antidepressant in a child, adolescent, or young adult must balance this risk with the clinical need. Short-term studies did not show an increase in the risk of suicidality with antidepressants compared to placebo in adults beyond age 24; there was a reduction in risk with antidepressants compared to placebo in adults aged 65 or older. Depression and certain other psychiatric disorders are themselves associated with increases in the risk of suicide. Patients of all ages who are started on antidepressant therapy should be monitored appropriately and observed closely for clinical worsening, suicidality, or unusual changes in behavior. Families and caregivers should be advised of the need for close observation and communication with the prescriber. Venlafaxine Extended Release Tablets are not approved for use in pediatric patients. [See Warnings and Precautions and Patient Counseling Information in the full Prescribing Information.]

**INDICATIONS AND USAGE:** Venlafaxine Extended Release Tablets (venlafaxine hydrochloride) are indicated for the treatment of major depressive disorder (MDD) and Social Anxiety Disorder (SAD), also known as Social Phobia, as defined by DSM-IV. Efficacy of venlafaxine in MDD was shown in both short-term trials and a longer-term trial. Efficacy in SAD was established in short-term trials. **CONTRAINDICATIONS:** Concomitant use in patients taking monoamine oxidase inhibitors (MAOIs) [see Warnings and Precautions, Potential for Interaction with Monoamine Oxidase Inhibitors]. **WARNINGS AND PRECAUTIONS: Clinical Worsening and Suicide Risk:** Patients with MDD, both adult and pediatric, may experience worsening of their depression and/or the emergence of suicidal ideation and behavior (suicidality) or unusual changes in behavior, whether or not they are taking antidepressant medications, and this risk may persist until significant remission occurs. Suicide is a known risk of depression and other psychiatric disorders, and these disorders themselves are the strongest predictors of suicide. There has been a long-standing concern, however, that antidepressants may have a role in inducing worsening of depression and the emergence of suicidality in certain patients during the early phases of treatment. Pooled analyses of short-term placebo-controlled trials of antidepressant drugs (SSRIs and others) showed that these drugs increase the risk of suicidal thinking and behavior (suicidality) in short-term studies in children and adolescents and young adults (ages 18-24) with MDD and other psychiatric disorders. Short-term studies did not show an increase in the risk of suicidality with antidepressants compared to placebo in adults beyond age 24; there was a reduction with antidepressants compared to placebo in adults aged 65 and older. The pooled analyses of placebo-controlled trials in children and adolescents with MDD, obsessive-compulsive disorder, or other psychiatric disorders included a total of 24 short-term trials of 9 antidepressant drugs in over 4400 patients. The pooled analyses of placebo-controlled trials in adults with MDD or other psychiatric disorders included a total of 295 short-term trials (median duration of 2 months) of 11 antidepressant drugs in over 77,000 patients. There was considerable variation in risk of suicidality among drugs, but a tendency toward an increase in the younger patients for almost all drugs studied. There were differences in absolute risk of suicidality across the different indications, with the highest incidence in MDD. The risk differences (drug vs placebo), however, were relatively stable within age strata and across indications. No suicides occurred in any of the pediatric trials. There were suicides in the adult trials, but the number was not sufficient to reach any conclusion about drug effect on suicide. It is unknown whether the suicidality risk extends to longer-term use, i.e., beyond several months. However, there is substantial evidence from placebo-controlled maintenance trials in adults with depression that the use of antidepressants can delay the recurrence of depression. **All patients being treated with antidepressants for any indication should be monitored appropriately and observed closely for clinical worsening, suicidality, and unusual changes in behavior, especially during the initial few months of a course of drug therapy, or at times of dose changes, either increases or decreases.** The following symptoms, anxiety, agitation, panic attacks, insomnia, irritability, hostility, aggressiveness, impulsivity, akathisia (psychomotor restlessness), hypomania, and mania, have been reported in adult and pediatric patients being treated with antidepressants for MDD as well as for other indications, both psychiatric and nonpsychiatric. Although a causal link between the emergence of such symptoms and either the worsening of depression and/or the emergence of suicidal impulses has not been established, there is concern that such symptoms may represent precursors to emerging suicidality. Consideration should be given to changing the therapeutic regimen, including possibly discontinuing the medication, in patients whose depression is persistently worse, or who are experiencing emergent suicidality or symptoms that might be precursors to worsening depression or suicidality, especially if these symptoms are severe, abrupt in onset, or were not part of the patient's presenting symptoms. If the decision has been made to discontinue treatment, medication should be tapered, as rapidly as is feasible, but with recognition that abrupt discontinuation can be associated with certain symptoms [see Dosage and Administration (2.5) and Warnings and Precautions (5.7) in the full prescribing information for a description of the risks of discontinuation of Venlafaxine Extended-Release Tablets]. **Families and caregivers of patients being treated with antidepressants for MDD or other indications, both psychiatric and nonpsychiatric, should be alerted about the need to monitor patients for the emergence of agitation, irritability, unusual changes in behavior, and the other symptoms described above, as well as the emergence of suicidality, and to report such symptoms immediately to health care providers. Such monitoring should include daily observation by families and caregivers.** Prescriptions for Venlafaxine Extended Release Tablets should be written for the smallest quantity of tablets consistent with good patient management, in order to reduce the risk of overdose. **Potential for Interaction With Monoamine Oxidase Inhibitors:** Adverse reactions, some serious, have been reported in patients who recently discontinued an MAOI and started on venlafaxine hydrochloride, or who recently discontinued venlafaxine hydrochloride prior to initiation of an MAOI. These reactions included tremor, myoclonus, diaphoresis, nausea, vomiting, flushing, dizziness, hyperthermia with features resembling neuroleptic malignant syndrome, seizures, and death. Venlafaxine Extended Release Tablets should not be used in combination with an MAOI, or within at least 14 days of discontinuing treatment with an MAOI. At least 7 days should be allowed after stopping venlafaxine hydrochloride before starting an MAOI. A major depressive episode may be the initial presentation of bipolar disorder. It is generally believed (though not established in controlled trials) that treating such an episode with an antidepressant alone may increase the likelihood of precipitation of a mixed/manic episode in patients at risk for bipolar disorder. Whether any of the symptoms described above represent such a conversion is unknown. However, prior to initiating treatment with an antidepressant, patients with depressive symptoms should be adequately screened to determine if they are at risk for bipolar disorder. It should be noted that Venlafaxine Extended Release Tablets are not approved for use in treating bipolar depression. **Serotonin Syndrome:** The development of potentially life-threatening serotonin syndrome may occur with Venlafaxine Extended Release Tablets treatment, particularly with (1) concomitant use of serotonergic drugs and (2) drugs that impair metabolism of serotonin [see WARNINGS AND PRECAUTIONS in full Prescribing Information]. If concomitant treatment of Venlafaxine Extended Release Tablets treatment, particularly with concomitant use of serotonergic drugs (including SSRIs, SNRIs and triptans) and with drugs that impair metabolism of serotonin (including MAOIs). The concomitant use of Venlafaxine Extended Release Tablets with MAOIs is contraindicated [see Contraindications (4) and Warnings and Precautions (5.2)]. If concomitant treatment of Venlafaxine Extended Release Tablets with an SSRI, an SNRI, or a 5-hydroxytryptamine receptor agonist (triptan) is clinically warranted, careful observation of the patient is advised, particularly during treatment initiation and dose increases. The concomitant use of Venlafaxine Extended Release Tablets with serotonin precursors (such as tryptophan supplements) is not recommended. **Sustained Hypertension:** Venlafaxine hydrochloride is associated with sustained dose-related increases in blood pressure (BP) in some patients. Sustained BP increases could have adverse consequences. Postmarketing cases of elevated BP requiring immediate treatment have been reported. Caution should be exercised in treating patients with pre-existing hypertension or other underlying conditions that might be compromised by BP increases. Preexisting hypertension should be controlled before Venlafaxine Extended Release Tablets therapy is initiated. It is recommended that patients receiving Venlafaxine Extended Release Tablets have regular monitoring of BP. For patients experiencing sustained increase in BP, either dose reduction or discontinuation should be considered. **Elevations in Systolic and Diastolic Blood Pressure (SBP, DBP):** In placebo-controlled premarketing studies, there were changes in mean BP. In most indications, a dose-related increase in SBP and DBP was evident. Across all trials, 1.4% of patients receiving extended-release venlafaxine hydrochloride experienced a  $\geq 15$  mm Hg increase in supine DBP with BP  $\geq 105$  mm Hg, compared to 0.9% of patients in the placebo groups. One percent of patients receiving venlafaxine hydrochloride experienced a  $\geq 20$  mm Hg increase in supine SBP with BP  $\geq 180$  mm Hg compared to 0.3% of patients in the placebo groups. **Mydriasis:** Mydriasis has been reported in association with venlafaxine

hydrochloride; patients with raised intraocular pressure or patients at risk for acute narrow-angle glaucoma should be monitored. **Discontinuation of Treatment with Venlafaxine Extended Release Tablets:** Discontinuation symptoms have been systematically evaluated in patients taking venlafaxine, to include prospective analyses of clinical trials and retrospective surveys of trials in MDD and SAD. Abrupt discontinuation or dose reduction of venlafaxine at various doses has been associated with the appearance of new symptoms, the frequency of which increased with increased dose level and longer duration of treatment. Reported symptoms include agitation, anorexia, anxiety, confusion, impaired coordination and balance, diarrhea, dizziness, dry mouth, dysphoric mood, fasciculation, fatigue, headaches, hypomania, insomnia, nausea, nervousness, nightmares, sensory disturbances (including shock-like electrical sensations), somnolence, sweating, tinnitus, tremor, vertigo, and vomiting. During marketing of venlafaxine hydrochloride extended-release capsules, other SNRIs, and SSRIs, there have been spontaneous reports of adverse reactions occurring upon discontinuation of these drugs, particularly when abrupt, including the following: dysphoric mood, irritability, agitation, dizziness, sensory disturbances (e.g., paresthesias), anxiety, confusion, headache, lethargy, emotional lability, insomnia, hypomania, tinnitus, and seizures. While these reactions are generally self-limiting, there have been reports of serious discontinuation symptoms. Patients should be monitored for these symptoms when discontinuing treatment. A gradual reduction in the dose rather than abrupt cessation is recommended whenever possible. If intolerable symptoms occur following a decrease in the dose or upon discontinuation of treatment, then resuming the previously prescribed dose may be considered. Subsequently, the physician may continue decreasing the dose but at a more gradual rate [see Dosage and Administration (2.4) in full prescribing information]. **Insomnia and Nervousness:** Treatment-emergent insomnia and nervousness were more commonly reported for patients treated with venlafaxine hydrochloride extended-release capsules than with placebo in pooled analyses of short-term MDD and other clinical studies, as shown in Table 5 in the full prescribing information. **Changes in Weight:** In some placebo-controlled trials in MDD, 4% of the patients treated with venlafaxine hydrochloride extended-release capsules and 1% of the placebo-treated patients sustained a loss of 7% or more of body weight during up to 6 months of treatment. The safety and efficacy of venlafaxine therapy in combination with weight loss agents have not been established. Co-administration of Venlafaxine Extended Release Tablets and weight loss agents is not recommended. Venlafaxine Extended Release Tablets are not indicated for weight loss alone or in combination with other products. **Changes in Height:** Pediatric Patients: In the six-month, open-label MDD study, children and adolescents had height increases that were less than expected based on data from age- and sex-matched peers. The difference between observed growth rates and expected growth rates was larger for children (<12 years old) than for adolescents ( $\geq 12$  years old). **Changes in Appetite:** Adult Patients: Treatment-emergent anorexia was more commonly reported for patients treated with venlafaxine hydrochloride extended-release capsules than for placebo-treated patients in the pool of short-term, double-blind, placebo-controlled MDD (8% vs 4%) and SAD (20% vs 2%) studies. Pediatric Patients: In placebo-controlled trials in MDD and another disorder, 10% of patients aged 6-17 treated with venlafaxine hydrochloride extended-release capsules for up to eight weeks and 3% of patients treated with placebo reported treatment-emergent anorexia. **Activation of Mania/Hypomania:** Mania or hypomania occurred during MDD studies in 0.3% of patients treated with extended-release venlafaxine compared with 0% of placebo patients. With immediate release venlafaxine, the rate was 0.5% compared with 0% of placebo patients. No reports of mania or hypomania were reported in trials with SAD. As with all drugs effective in the treatment of MDD, Venlafaxine Extended Release Tablets should be used cautiously in patients with a history of mania. **Hypонатremia:** Hyponatremia may occur as a result of treatment with SSRIs and SNRIs, including Venlafaxine Extended Release Tablets. In many cases, this hyponatremia appears to be the result of the syndrome of inappropriate antidiuretic hormone secretion (SIADH). Cases with serum sodium lower than 110 mmol/L have been reported. Elderly patients may be at greater risk of developing hyponatremia with SSRIs and SNRIs. Also, patients taking diuretics or who are otherwise volume depleted may be at greater risk [see Use in Specific Populations (8.5) in full prescribing information]. Discontinuation of Venlafaxine Extended Release Tablets should be considered in patients with symptomatic hyponatremia, and appropriate medical intervention should be instituted. **Seizures:** In all premarketing venlafaxine hydrochloride MDD trials, seizures were reported in 0.3% of venlafaxine hydrochloride-treated patients. Venlafaxine Extended Release Tablets should be used cautiously in patients with a history of seizures and should be discontinued in any patient who develops seizures. **Abnormal Bleeding:** SSRIs and SNRIs, including Venlafaxine Extended Release Tablets, may increase the risk of bleeding events. Concomitant use of aspirin, nonsteroidal anti-inflammatory drugs (NSAIDs), warfarin, and other anticoagulants may add to this risk. Bleeding events related to SSRIs and SNRIs use have ranged from ecchymoses, hematomas, epistaxis, and petechiae to life-threatening hemorrhages. Patients should be cautioned about the risk of bleeding associated with the concomitant use of Venlafaxine Extended Release Tablets and other drugs that affect coagulation. **Serum Cholesterol Elevation:** Clinically relevant increases in serum cholesterol were recorded in 5.3% of venlafaxine hydrochloride-treated patients and 0.0% of patients receiving placebo for at least 3 months in trials. Measurement of serum cholesterol levels should be considered during long-term treatment. **Interstitial Lung Disease and Eosinophilic Pneumonia:** Interstitial lung disease and eosinophilic pneumonia associated with venlafaxine therapy have been rarely reported. The possibility of these adverse reactions should be considered in venlafaxine-treated patients who present with progressive dyspnea, cough, or chest discomfort. Such patients should undergo prompt medical evaluation, and discontinuation of venlafaxine therapy should be considered. **Use in Patients with Heart Disease:** Premarketing experience with venlafaxine in patients with concomitant systemic illness is limited. Caution is advised in administering Venlafaxine Extended Release Tablets to patients with diseases or conditions that could affect hemodynamic responses. Venlafaxine has not been evaluated or used to any appreciable extent in patients with a recent history of myocardial infarction or unstable heart disease. Patients with these diagnoses were systematically excluded from many clinical studies during venlafaxine's premarketing testing. As increases in heart rate (mean increase of 4 beats per minute in MDD trials and 5 beats per minute in SAD trials) were observed, caution should be exercised in patients whose underlying medical conditions might be compromised by increases in heart rate (e.g., patients with hyperthyroidism, heart failure, or recent myocardial infarction). **ADVERSE REACTIONS: Clinical Studies Experience: Short-Term, Placebo-Controlled Trials: Adverse Events Leading to Discontinuation of Treatment:** Approximately 11% of the 357 patients who received venlafaxine hydrochloride extended-release capsules in MDD trials discontinued treatment due to an adverse reaction (vs 6% of the 285 placebo-treated patients). Adverse reactions that led to treatment discontinuation in at least 2% of drug-treated patients were nausea, dizziness and somnolence. Approximately 17% of the 277 patients in SAD trials who received venlafaxine hydrochloride extended-release capsules discontinued treatment due to an adverse reaction (vs 5% of the 274 placebo-treated patients). Adverse reactions that led to treatment discontinuation in at least 2% of drug-treated patients were nausea, insomnia, impotence, headache, dizziness and somnolence. **Adverse Events Occurring at an Incidence of 5% or More: Major Depressive Disorder:** Note in particular the following adverse reactions that occurred in at least 5% of the patients receiving venlafaxine hydrochloride extended-release capsules and at a rate at least twice that of the placebo group for all placebo-controlled trials for the MDD indication (see Table 6): Abnormal ejaculation, gastrointestinal complaints (nausea, dry mouth, and anorexia), CNS complaints (dizziness, somnolence, and abnormal dreams), and sweating. In the two U.S. placebo-controlled trials, the following additional reactions occurred in at least 5% of patients treated with venlafaxine hydrochloride extended-release capsules (n = 192) and at a rate at least twice that of the placebo group: Abnormalities of sexual function (impotence in men, anorgasmia in women, and libido decreased), gastrointestinal complaints (constipation and flatulence), CNS complaints (insomnia, nervousness, and tremor), problems of special senses (abnormal vision), cardiovascular effects (hypertension and vasodilation), and yawning. **Social Anxiety Disorder:** Note in particular the following adverse reactions that occurred in at least 5% of the patients receiving venlafaxine hydrochloride extended-release capsules and at a rate at least twice that of the placebo group for the 2 placebo-controlled trials for the SAD indication (see Table 7): Asthenia, gastrointestinal complaints (anorexia, constipation, dry mouth, nausea), CNS complaints (dizziness, insomnia, libido decreased, nervousness, somnolence), abnormalities of sexual function (abnormal ejaculation, impotence, libido decreased, orgasmic dysfunction), yawn, sweating, and abnormal vision. **Adverse Events Occurring at an Incidence of 2% or More:** MDD and SAD trials included patients receiving venlafaxine hydrochloride extended-release capsules in doses ranging from 75 mg to 225 mg/day for up to 12 weeks. The prescriber should be aware that the following adverse reactions figures cannot be used to predict the incidence of adverse reactions in the course of usual medical practice. Similarly, the cited frequencies cannot be compared with figures obtained from other clinical investigations involving different treatments, uses, and investigators. The cited figures, however, do provide the prescribing physician with some basis for estimating the relative contribution of drug and non-drug factors to adverse reaction incidence rate in the population studied. [See TABLE 6 in full Prescribing Information.] **TABLE 6: Treatment Emergent Adverse Reaction Incidence in Short-Term Placebo-Controlled Clinical Trials with Venlafaxine Hydrochloride Extended-Release Capsules in Patients with Major Depressive Disorder.** This table reports adverse events that occurred in 2% or more of patients treated with venlafaxine hydrochloride extended-release capsules where the incidence in patients treated with venlafaxine hydrochloride extended-release capsules (n=357) was greater than the incidence for the respective placebo-treated patients (n=285). For each adverse reaction, the incidence of reactions in the drug-treated patients is listed below the incidence in placebo-treated patients. **Body as a Whole:** Asthenia (8% and 7%). **Cardiovascular System:** Vasodilation (4% and 2%); Hypertension (4% and 1%). **Digestive System:** Nausea (31% and 7%); Constipation (8% and 5%); Anorexia (8% and 4%); Vomiting (4% and 2%); Flatulence (4% and 3%). **Metabolic/Nutritional:** Weight Loss (3% and 0%). **Nervous System:** Dizziness (20% and 9%);

Somnolence (17% and 8%) Insomnia (17% and 11%); Dry mouth (12% and 6%); Nervousness (10% and 5%); Abnormal Dreams (7% and 2%); Tremor (5% and 2%); Depression (3% and <1%); Paresthesia (3% and 1%); Libido Decreased (3% and <1%); Agitation (3% and 1%). **Respiratory System:** Pharyngitis (7% and 6%); Yawn (3% and 0%). **Skin:** Sweating (14% and 3%). **Special Senses:** Abnormal vision (4% and <1%). **Urogenital System:** Abnormal ejaculation (16% and <1%); Impotence (4% and <1%); Female anorgasmia (3% and <1%). [See TABLE 7 in full Prescribing Information]. **TABLE 7: Treatment Emergent Adverse Reaction Incidence in Short-Term Placebo-Controlled Clinical Trials with Venlafaxine Hydrochloride Extended-Release Capsules in Patients with Social Anxiety Disorder.** This table reports adverse events that occurred in 2% or more of patients treated with venlafaxine hydrochloride extended-release capsules where the incidence in patients treated with venlafaxine hydrochloride extended-release capsules (n=277) was greater than the incidence for the respective placebo-treated patients (n=274). For each adverse reaction, the incidence of reactions in the drug-treated patients is listed before the incidence in placebo-treated patients. **Body as a Whole:** Headache (34% and 33%); Asthenia (17% and 8%); Flu Syndrome (6% and 5%); Accidental Injury (5% and 3%); Abdominal Pain (4% and 3%). **Cardiovascular System:** Hypertension (5% and 4%); Vasodilation (3% and 1%); Palpitation (3% and 1%). **Digestive System:** Nausea (29% and 9%); Anorexia (20% and 1%); Constipation (8% and 4%); Diarrhea (6% and 5%); Vomiting (3% and 2%); Eructation (2% and 0%). **Metabolic/Nutritional:** Weight Loss (4% and 0%). **Nervous System:** Insomnia (23% and 7%); Dry mouth (17% and 4%); Dizziness (16% and 8%); Somnolence (16% and 8%); Nervousness (11% and 3%); Libido Decreased (9% and <1%); Anxiety (5% and 3%); Agitation (4% and 1%); Tremor (4% and <1%); Abnormal Dreams (4% and <1%); Paresthesia (3% and <1%); Twitching (2% and 0%). **Respiratory System:** Yawn (5% and <1%); Sinusitis (2% and 1%). **Skin:** Sweating (13% and 2%). **Special Senses:** Abnormal vision (6% and 3%). **Urogenital System:** Abnormal ejaculation (16% and 1%); Impotence (10% and 1%); Female Organic Dysfunction (8% and 0%). **Vital Sign Changes:** Venlafaxine hydrochloride was associated with a mean increase in pulse rate of 4 beats/min in SAD trials. In premarketing trials, the mean change from baseline heart rate for patients treated with extended-release venlafaxine hydrochloride in MDD and SAD trials was 4 beats-per-minute and 5 beats-per-minute, respectively. In a flexible-dose study with doses ranging from 200 mg to 375 mg/day, patients receiving extended-release venlafaxine hydrochloride had a mean increase in heart rate of 8.5 beats-per-minute [see WARNINGS AND PRECAUTIONS in full Prescribing Information for effects on heart rate and blood pressure]. **Laboratory Changes:** Clinically relevant increases in serum cholesterol were noted in venlafaxine hydrochloride clinical trials. Increases were duration dependent over the study period and tended to be greater with higher doses. **ECG Changes:** In a flexible-dose MDD study with doses of venlafaxine hydrochloride immediate-release tablets in the range of 200 to 375 mg/day and mean dose greater than 300 mg/day, the mean change in heart rate was 8.5 beats per minute compared with 1.7 beats per minute for placebo. [See Warnings and Precautions (5.17)]. **POSTMARKETING EXPERIENCE:** Voluntary reports of other adverse reactions temporally associated with the use of venlafaxine have been received since market introduction. Because these reactions have been reported from a population of uncertain size, it is not always possible to reliably estimate their frequency or establish a causal relationship to drug exposure. These reports include the following reactions: agranulocytosis, anaphylaxis, aplastic anemia, cataplexy, congenital anomalies, impaired coordination and balance, CPK increased, deep vein thrombophlebitis, delirium, EKG abnormalities such as QT prolongation; cardiac arrhythmias including atrial fibrillation, supraventricular tachycardia, ventricular extrasystoles, and rare reports of ventricular fibrillation and ventricular tachycardia, including torsade de pointes; epidermal necrolysis/Stevens-Johnson syndrome, erythema multiforme, extrapyramidal symptoms (including dyskinesia and tardive dyskinesia), angle-closure glaucoma, hemorrhage (including eye and gastrointestinal bleeding), hepatic reactions (including GGT elevation, abnormalities of unspecified liver function tests; liver damage, necrosis, or failure; and fatty liver), interstitial lung disease, involuntary movements, LDI increased, neuroleptic malignant syndrome-like reactions (including a case of a 10-year-old who may have been taking methylphenidate, was treated and recovered), neutropenia, night sweats, pancreatitis, pancytopenia, panic, prolactin increased, renal failure, rhabdomyolysis, serotonin syndrome, shock-like electrical sensations or tinnitus (in some cases, subsequent to the discontinuation of venlafaxine or tapering of dose), and syndrome of inappropriate antidiuretic hormone secretion (usually in the elderly). **DRUG INTERACTIONS: Alcohol:** The effect of alcohol on plasma levels of Venlafaxine Extended Release Tablets is not known. **Cimetidine:** Use caution when administering venlafaxine hydrochloride with cimetidine to patients with preexisting hypertension or hepatic dysfunction, and the elderly. **Diazepam:** A single dose of diazepam did not appear to affect the PK of either venlafaxine hydrochloride (150 mg/day) or its major active metabolite, O-desmethylvenlafaxine (ODV). Venlafaxine hydrochloride did not have any effect on the PK of diazepam or its active metabolite, desmethyldiazepam, or affect the psychomotor and psychometric effects induced by diazepam. **Haloperidol:** Venlafaxine hydrochloride (150 mg/day) decreased total oral-dose clearance of haloperidol, resulting in a 70% increase in haloperidol AUC. The haloperidol C<sub>max</sub> increased 88%, but the haloperidol elimination t<sub>1/2</sub> was unchanged. **Lithium:** A single dose of lithium (600 mg) did not appear to affect the PK of either venlafaxine hydrochloride (150 mg/day) or ODV. Venlafaxine hydrochloride had no effect on the PK of lithium. **Drugs Highly Bound to Plasma Proteins:** Venlafaxine hydrochloride is not highly bound to plasma proteins; coadministration of Venlafaxine Extended Release Tablets and a highly protein-bound drug should not cause increased free concentrations of the other drug. **Drugs That Inhibit Cytochrome P450 Isoenzymes:** CYP2D6 and CYP3A4 inhibitors: Venlafaxine hydrochloride is metabolized to ODV by CYP2D6. Drugs inhibiting this isoenzyme have the potential to increase plasma concentrations of venlafaxine hydrochloride and decrease those of ODV. Because venlafaxine hydrochloride and ODV are approximately equiactive and equipotent, no dosage adjustment is required when venlafaxine hydrochloride is coadministered with a CYP2D6 inhibitor. Pharmacokinetic studies with ketoconazole in both poor and extensive metabolizers of CYP2D6 resulted in higher plasma concentrations and AUCs of both venlafaxine hydrochloride and ODV in most subjects following administration of ketoconazole. Concomitant use of CYP3A4 inhibitors and venlafaxine hydrochloride may increase levels of both venlafaxine hydrochloride and ODV. Use caution if therapy includes venlafaxine hydrochloride and any CYP3A4 inhibitor. **Drugs Metabolized by Cytochrome P450 Isoenzymes:** Venlafaxine hydrochloride is a relatively weak inhibitor of CYP2D6 in vitro. Imipramine: Venlafaxine hydrochloride did not affect the PK of imipramine or 2-OH-imipramine. However, desipramine AUC, C<sub>max</sub>, and C<sub>min</sub> increased by about 35% in the presence of venlafaxine hydrochloride. The 2-OH-desipramine AUCs increased by 2.5 to 4.5 fold (with venlafaxine hydrochloride doses of up to 75 mg q 12h). The clinical significance of elevated 2-OH-desipramine is unknown. Imipramine did not affect the PK of venlafaxine hydrochloride and ODV. Metoprolol: Venlafaxine hydrochloride (50 mg q 8h for 5 days) appeared to reduce the blood-lowering effect of metoprolol (100 mg q 24h for 5 days) in one study. Caution should be exercised when these drugs are given together. Risperidone: Venlafaxine hydrochloride (150 mg/day) slightly inhibited metabolism of a single 1-mg dose of risperidone, resulting in an about 32% increase in risperidone AUC. Venlafaxine hydrochloride coadministration did not significantly alter the PK profile of the total active moiety (risperidone plus its metabolite 9-hydroxyrisperidone). CYP3A4: Venlafaxine hydrochloride did not inhibit CYP3A4 in vitro or in vivo. Indinavir: In healthy volunteers, venlafaxine hydrochloride (150 mg/day) resulted in a 28% decrease in the AUC of a single dose of a single 800-mg dose of indinavir and a 36% decrease in indinavir C<sub>max</sub>. Indinavir did not affect the PK of venlafaxine hydrochloride and ODV. CYP1A2: Venlafaxine hydrochloride did not inhibit CYP1A2 in vitro or in vivo. CYP2C9: Venlafaxine hydrochloride did not inhibit CYP2C9 in vitro. In vivo, venlafaxine hydrochloride 75 mg (75 mg q 12h) did not alter the PK of a single 550-mg dose of tolbutamide or the CYP2C9-mediated formation of 4-OH-tolbutamide. CYP2C19: Venlafaxine hydrochloride did not inhibit the metabolism of diazepam, which is partially metabolized by CYP2C19 (see Diazepam above). **MAOIs:** [See CONTRAINDICATIONS and WARNINGS AND PRECAUTIONS in full Prescribing Information.] **Other CNS-Active Drugs:** Caution is advised if there is concomitant use of venlafaxine and other CNS-active drugs. Serotonergic Drugs and Triptans: Based on the mechanism of action of Venlafaxine Extended Release Tablets and the potential for serotonin syndrome, caution is advised when Venlafaxine Extended Release Tablets are coadministered with other drugs that may affect the serotonergic neurotransmitter systems, such as triptans, SSRIs, other SNRIs, linezolid, lithium, tramadol, or St. John's Wort. If concomitant treatment of Venlafaxine Extended Release Tablets with these drugs is warranted, careful observation of the patient is advised, particularly during treatment initiation and dose increases. Concomitant use of Venlafaxine Extended Release Tablets with tryptophan supplements is not recommended [see WARNINGS AND PRECAUTIONS in full Prescribing Information]. There have been rare postmarketing reports of serotonin syndrome with use of an SSRI and a triptan. If concomitant use of Venlafaxine Hydrochloride Extended Release tablets with a triptan is warranted, careful observation of the patient is advised, particularly during treatment initiation and dose increases [see WARNINGS AND PRECAUTIONS in full Prescribing Information]. **Drugs That Interfere With Hemostasis:** Interference with serotonin reuptake may affect platelet function and result in bleeding. Concurrent use of NSAIDs or aspirin may increase this risk. Increases in prothrombin time (PT), partial thromboplastin time (PTT), or INR have been reported when venlafaxine hydrochloride was given to patients on warfarin therapy. Patients on warfarin should be carefully monitored when Venlafaxine Extended Release Tablets are begun or discontinued. **Electroconvulsive Therapy:** There is no clinical data establishing the benefit of electroconvulsive therapy combined with Venlafaxine Hydrochloride Extended Release Tablets. **Postmarketing Spontaneous Drug Interaction Reports:** There have been reports of elevated clozapine levels temporally associated with adverse reactions, including seizures, following the addition of venlafaxine. There have been reports of increases in PT, PTT, or INR when venlafaxine was given to patients also receiving warfarin. **USE IN SPECIFIC POPULATIONS: Pregnancy: Teratogenic Effects: Pregnancy Category C:** There are no adequate and well-controlled studies of venlafaxine in pregnant women.

Venlafaxine Extended Release Tablets should be used during pregnancy only if clearly needed. **Non-Teratogenic Effects:** Neonates exposed to venlafaxine hydrochloride late in the third trimester have developed complications requiring prolonged hospitalization, respiratory support, and tube feeding. Complications can arise immediately upon delivery. Reports include respiratory distress, cyanosis, apnea, seizures, unstable temperature, feeding difficulty, vomiting, hypoglycemia, hypo- and hypertonia, hyperreflexia, tremor, jitteriness, irritability, and constant crying. This is consistent with a toxic effect of SSRIs or SNRIs or a drug discontinuation syndrome. In some cases, it is consistent with serotonin syndrome. When treating a pregnant woman with Venlafaxine Extended Release Tablets during the third trimester, carefully consider the potential risks and benefits of treatment. **Labor and Delivery:** The effect of venlafaxine hydrochloride on labor and delivery in humans is unknown. **Nursing Mothers:** Venlafaxine hydrochloride and ODV, its active metabolite, are excreted in human milk. Because of the potential for serious adverse reactions in nursing infants, a decision should be made whether to discontinue nursing or to discontinue Venlafaxine Extended Release Tablets, taking into account the importance of the drug to the mother. **Pediatric Use:** Safety and effectiveness in the pediatric population have not been established [see BOXED WARNING and Warnings and Precautions: Clinical Worsening and Suicide Risk]. Anyone considering using Venlafaxine Extended Release Tablets in a child or adolescent must balance the potential risks with the clinical need. While no studies have adequately assessed the impact of venlafaxine hydrochloride on growth, development, and maturation of children and adolescents, studies suggest it may adversely affect weight and height [see WARNINGS AND PRECAUTIONS: General: Changes in Height and Changes in Weight in full Prescribing Information]. Should the decision be made to treat a pediatric patient with Venlafaxine Extended Release Tablets, regular monitoring of weight and height is recommended during treatment, particularly if long term. The safety of venlafaxine hydrochloride in pediatric patients has not been assessed for treatment beyond 6 months. In patients aged 6-17, clinically relevant blood pressure and cholesterol increases were similar to those observed in adult patients. The precautions for adults apply to pediatric patients. **Geriatric Use:** While no overall differences in effectiveness or safety were observed between geriatric and younger patients, greater sensitivity of some older individuals cannot be ruled out. The elderly may be at greater risk for significant hyponatremia. No dose adjustment is recommended based on age alone. **Patients With Hepatic Impairment:** Decreased clearance was noted in patients with cirrhosis. A lower dose may be necessary in these patients; extra caution should be used in these patients. **Patients With Renal Impairment:** In patients with GFR = 10 to 70 mL/min, clearance of venlafaxine hydrochloride and its metabolites were decreased. It is recommended that total daily dose of Venlafaxine Extended Release Tablets be reduced by 25% to 50% in these patients. Individualization of dosage may be desirable in some patients. In hemodialysis patients, it is recommended that total daily dose be reduced by 50%. Venlafaxine Extended Release Tablets should be used with caution in such patients. **DRUG ABUSE AND DEPENDENCE:** Venlafaxine Extended Release Tablets are not a controlled substance. Carefully evaluate patients for history of drug abuse and observe such patients closely for signs of misuse or abuse of venlafaxine hydrochloride. Discontinuation effects have been reported in patients receiving venlafaxine hydrochloride [see WARNINGS AND PRECAUTIONS; and DOSAGE AND ADMINISTRATION in full Prescribing Information]. **OVERDOSAGE:** In postmarketing experience, overdosage has occurred predominantly in combination with alcohol and/or other drugs. The most commonly reported reactions include tachycardia, changes in consciousness, mydriasis, and vomiting. Electrocardiogram changes (eg, prolongation of QT interval, bundle branch block, QRS prolongation), ventricular tachycardia, bradycardia, hypotension, rhabdomyolysis, vertigo, liver necrosis, serotonin syndrome, and death have been reported. Ensure an adequate airway, oxygenation, and ventilation. Monitor cardiac rhythm and vital signs. General supportive and symptomatic measures are also recommended. Induction of emesis is not recommended. Gastric lavage with a large-bore orogastric tube with appropriate airway protection, if needed, may be indicated if performed soon after ingestion or in symptomatic patients. Activated charcoal should be administered. Due to the large volume of distribution of this drug, forced diuresis, dialysis, hemoperfusion, and exchange transfusion are unlikely to be of benefit. No specific antidotes for venlafaxine hydrochloride are known. In managing overdosage, consider the possibility of multiple drug involvement. Consider contacting a poison control center for additional information on treatment. Telephone numbers for certified poison control centers are listed in the Physicians' Desk Reference® (PDR®). **DOSAGE AND ADMINISTRATION:** Consult full prescribing information for dosing instructions. **Switching Patients to or From an MAOI: At least 14 days should elapse between discontinuation of an MAOI and initiation of therapy with Venlafaxine Extended Release Tablets. At least 7 days should be allowed after stopping Venlafaxine Extended Release Tablets before starting an MAOI [see WARNINGS AND PRECAUTIONS in full Prescribing Information].**

To report SUSPECTED ADVERSE REACTIONS, contact Upstate Pharma, LLC Pharmaceutical Corp. at 1-888-299-1053 or FDA at 1-800-FDA-1088 or [www.fda.gov/medwatch](http://www.fda.gov/medwatch).

This brief summary is based on Venlafaxine Extended Release Tablets Prescribing Information, August 2008. Osmotica Pharmaceutical Corp.

Marketed by Upstate Pharma, LLC, Rochester, NY 14623 for Osmotica Pharmaceutical, Wilmington, NC 28405.

©2008, Osmotica Pharmaceutical Corp., Wilmington, NC 28405, USA TA1047-1208

1E 08/2008

## #1 Integrated Health System

- ✓ Top 10 Clinic!
- ✓ Top 10 Hospital
- ✓ Low Cost Living

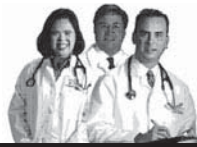

- Flexible Scheduling
- Family Friendly practice and community of 200K
- 40+ Bed Inpatient Unit

A Psychiatrist, BC/BE, is being sought to join a six-physician practice. Enjoy your life and practice with long-term physicians and staff. St. John's Clinic is a 480 physician multi-specialty clinic offering a very large referral base!

St. John's Regional Health Center, Springfield, Missouri is an 886-bed, level-one trauma center. St. John's Hospital serves as a referral hospital for 6+ regional hospitals serving 40 communities and covering 25,000 square miles.

**SPRINGFIELD, MISSOURI**, is located three hours south and southwest of Kansas City and St. Louis, respectively. A growing mid-sized city in the foothills of the Ozark Mountains, Springfield offers everything from Broadway performances and minor league and Division I athletics to outstanding schools and some of the best outdoor sporting opportunities available. Employment Review named Springfield one of the 20 "Best Places to Live and Work" in the U.S. Housing costs, projected job growth, education, healthcare, taxes, recreation, the arts and general cost of living rates, make living and working here a pleasure. For more information about Springfield, go to [www.springfieldmo.org](http://www.springfieldmo.org).

For more information, please contact:

**Julie A Oliver, Physician Recruiter**  
St. John's Clinic  
Phone: 800-218-5079  
Fax: 888-290-8300  
E-mail: [JAOliver@mercy.net](mailto:JAOliver@mercy.net)

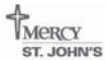

**ST. JOHN'S**  
POWERFUL MEDICINE

AA/EOE

## PSYCHIATRIST

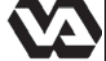

Department of Veterans Affairs, Central Texas Veterans Health Care System (CTVHCS), Temple, Texas, is accepting applications for BC Psychiatrist.

CTVHCS is affiliated with the Texas A&M University Health Science Center. There will be exciting opportunity for research and teaching. CTVHCS offers competitive salaries and excellent benefits. Applicants should have expertise in all aspects of inpatient and outpatient psychiatry.

Expertise or additional training or interest in the treatment of individuals with CMI, PTSD or chemical dependency is required. Added expertise in outpatient treatment of the seriously mentally ill is desirable.

Central Texas offers affordable housing, excellent schools, one of the lowest costs of living in the country and year round recreational opportunities highlighted by the lakes and rivers of the Texas Hill Country. No state income tax.

Candidate must be US citizen. Must possess a valid and unrestricted license in any state. Reasonable accommodation provided to any applicant with disabilities. Equal Opportunity Employer.

**APPLICANTS ARE SUBJECT TO DRUG TESTING.**

Please Fax or send CV to:

**Donna Zimmerman, Physician Recruiter**  
Texas Veterans Health Care System  
1901 Veterans Memorial Drive, Temple, TX 76504  
FAX: (254) 743-1412 or (254) 743-0007  
Phone: (254) 743-0049  
E-mail: [donna.zimmerman.va.gov](mailto:donna.zimmerman.va.gov)

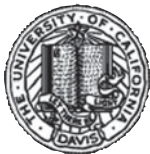

## UC DAVIS SCHOOL OF MEDICINE DEPARTMENT OF PSYCHIATRY AND BEHAVIORAL SCIENCES

### Chief, Addiction Psychiatry Division

The Department of Psychiatry and Behavioral Sciences at the UC Davis School of Medicine is recruiting a ladder rank/in residence Associate Professor or Professor of Psychiatry to develop a new Division of Addiction Psychiatry.

The successful candidate will be proposed for an appointment to an endowed professorship in addiction psychiatry which is currently in the process of being established. The candidate will also be proposed for appointment to the Northern California VA Health System to coordinate substance abuse clinical services, research and education at their Sacramento site.

The successful candidate should have a record of federally supported research in addiction psychiatry and experience in establishing and growing new research-oriented clinical enterprises.

A start-up package will be provided so the candidate may recruit several additional faculty members with experience in addiction psychiatry research.

The search committee is chaired by Professor Cameron Carter, Chief of the department's schizophrenia research program and Director of the medical center's Imaging Research Center.

The successful candidate should be board certified in general psychiatry, and be in possession of, or eligible for, a California Medical license.

**For full consideration, applications must be received by April 30, 2009.**

Position is open until filled, but no later than August 31, 2009. Interested candidates should email a curriculum vitae and letter of interest in response to Position #PY-05R-09 to Juli Koeberlein at [juli.koeberlein@ucdmc.ucdavis.edu](mailto:juli.koeberlein@ucdmc.ucdavis.edu) and contact Professor Carter at [cameron.carter@ucdmc.ucdavis.edu](mailto:cameron.carter@ucdmc.ucdavis.edu) for more information.

**<http://www.ucdmc.ucdavis.edu/psychiatry/>**

IN CONFORMANCE WITH APPLICABLE LAW AND UNIVERSITY POLICY, THE UNIVERSITY OF CALIFORNIA, DAVIS, IS AN EQUAL OPPORTUNITY/AFFIRMATIVE ACTION EMPLOYER.



# Psychiatrists - Wisconsin

Marshfield Clinic is nationally recognized for providing physicians with the most advanced medical equipment and health information technology today.

**We have openings for BE/BC Adult Psychiatrists** to join our expanding services. At our Marshfield campus, candidates with fellowship training in neuropsychiatry, geriatric psychiatry or consultative psychiatry are preferred. **Additional practice opportunities are also available at our various clinics throughout Wisconsin.** These primarily outpatient practices can be a mix of C/A and adult patients and employ a multidisciplinary team approach.

With over 770 physicians practicing at 43 locations throughout Wisconsin, Marshfield Clinic is the leader in providing high quality health care to the region. We have created an atmosphere for a clinical practice that exceeds most others. We offer physicians an excellent practice in an academic setting with opportunities for research and teaching. In addition, you will be in the midst of excellent school systems, and safe, friendly communities with easy access/proximity to major metropolitan areas including Chicago and Minneapolis.

To learn more about these opportunities and the very competitive compensation package, please contact: Beth Albee, Physician Recruitment, Marshfield Clinic, 1000 N. Oak Ave., Marshfield, WI 54449. **Phone:** 800-782-8581, extension 19775; **Fax #:** 715-221-9779. **E-mail:** [albee.beth@marshfieldclinic.org](mailto:albee.beth@marshfieldclinic.org) **Website:** [www.marshfieldclinic.org/recruit](http://www.marshfieldclinic.org/recruit)

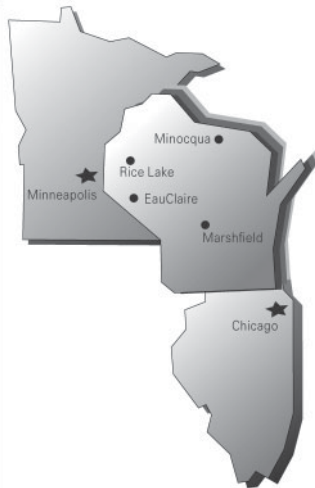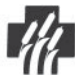

**MARSHFIELD CLINIC.**

*Where the future of medicine lives*

Marshfield Clinic is an Affirmative Action/Equal Opportunity employer that values diversity. Minorities, females, individuals with disabilities and veterans are encouraged to apply. Sorry, not a health professional shortage area.

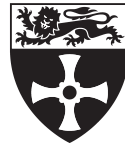

# Newcastle University

Institute of Neuroscience

## Professor of Neuroimaging in Psychiatry

This Chair will join the Psychobiology Research Group, whose overarching theme is the development of understanding of the neurobiological basis of affective disorder and its treatment. The group has a wide range of expertise and access to state-of-the-art MR and PET imaging facilities at the Newcastle Magnetic Resonance Imaging Centre. You will have an outstanding track record in biological psychiatry research with a strong interest in neuroimaging. You will be expected to establish a competitive research programme in the Institute of Neuroscience ([www.ncl.ac.uk/ion](http://www.ncl.ac.uk/ion)), as well as undertaking clinical commitments.

Informal enquiries may be made to Professor Colin Ingram, e-mail: [c.d.ingram@ncl.ac.uk](mailto:c.d.ingram@ncl.ac.uk) or tel: +44 (0)191 222 8210 or Professor Nicol Ferrier, e-mail: [i.n.ferrier@ncl.ac.uk](mailto:i.n.ferrier@ncl.ac.uk) or tel: +44 (0)191 282 4336.

**Please apply on line at**  
**<http://www.ncl.ac.uk/vacancies/>**  
**Job reference: G419.**  
**Closing date: 03/16/09.**

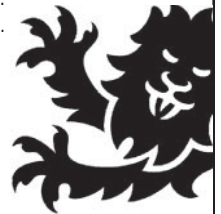

Committed to Equal Opportunities

[www.ncl.ac.uk/vacancies](http://www.ncl.ac.uk/vacancies)

## We are recruiting statewide for Psychiatrists!

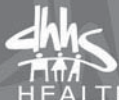

**NC DEPARTMENT OF HEALTH AND HUMAN SERVICES**  
[www.ncdhhs.gov](http://www.ncdhhs.gov)

We are striving to enhance quality mental health services for NC citizens and are looking for committed Psychiatrists wanting to make a difference!

As a Psychiatrist at one of our facilities, you will serve as an integral member of an interdisciplinary team, developing comprehensive treatment plans to address the individual, social, medical, and vocational needs of patients.

In addition, you will work in affiliation with prominent residency programs such as the University of North Carolina-Chapel Hill, Duke University, and Wake Forest University. We offer child adolescent, adult admissions, forensic and rehabilitation services at each of our hospitals.

From the mountains to the coast, we employ Psychiatrists at the following Hospitals and Alcohol & Drug Abuse Treatment Centers (ADATC):

- Broughton Hospital • Central Regional Hospital • Cherry Hospital
- Walter B. Jones ADATC • R.J. Blackley ADATC • Julian F. Keith ADATC

As an employee, you will have the security of competitive pay and comprehensive state benefits including the following:

- Loan Repayment Program
- Flexible Scheduling
- Special Pay Incentives
- Medical Malpractice Insurance

**For more information visit: [www.ncdhhs.gov](http://www.ncdhhs.gov) or contact Michael Taylor at 919.733.2040 or [mtaylor@ncfahp.org](mailto:mtaylor@ncfahp.org)**

North Carolina State Government Employer of Choice  
 EO/AA Employer

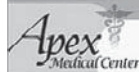

## Great Opportunity Beautiful Las Vegas!

### PSYCHIATRIST

Multi-speciality group seeking friendly motivated second Psychiatrist.

Competitive compensation package including: Medical/dental insurance, 401K paid malpractice, paid vacation/CME, relocation assistance, etc.

Main office at Central Las Vegas  
 JI/H Visa May Apply!

**Fax Resume to: 702-947-6702**  
**Or E-mail: [drez@apexmedicalcenter.net](mailto:drez@apexmedicalcenter.net)**

**APEX MEDICAL CENTER**

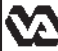

Department of  
Veterans Affairs

VA SIERRA NEVADA HEALTH  
CARE SYSTEM  
Reno, NV

PTSD Clinical Team and/or Mental Health Clinic  
Reno and Minden

### PSYCHIATRISTS

VA Sierra Nevada Health Care System (VASNHCS) in Reno, NV is seeking BC/BE psychiatrists, to join our mental health care team. For PTSD Clinical Team, experience working with combat veterans is highly desirable. Recruitment incentive may be available. Must be a U.S. citizen.

The VASNHCS provides primary and secondary care to a large geographical area that includes 20 counties in northern Nevada and northeastern California. Approx 120,000 veterans reside in this region. The Reno campus operates 64 hospital beds and 60 Community Living Center beds in addition to three CBOCs.

Academic affiliations for VASNHCS are the University Of Nevada School Of Medicine and the East Bay Surgical Program at the University of California, San Francisco. Approximately 45 medical, surgical, and psychiatry residents rotate annually through VASNHCS. Located on the eastern slope of the Sierra Nevada mountain range, Reno is minutes away from beautiful Lake Tahoe. Year round recreation, entertainment, arts, and culture abound. Reno also boasts an average of 260 days of sunshine per year. Best of all, Nevada has no state income tax!

A career with the VA offers stable employment and a future that is challenging, satisfying, and rewarding. Our excellent patient care environment includes learning and teaching opportunities, an advanced electronic medical records system, and competitive salaries. We have a generous comprehensive benefits package including education debt reduction program and liability protection.

Visit [www.vacareers.va.gov](http://www.vacareers.va.gov) for more details.

Fax or email CV to Lenore Reinhard, RN, Healthcare Recruiter  
Fax: 775-328-1754, email: [lenore.reinhard@va.gov](mailto:lenore.reinhard@va.gov)

Providing World Class Care and Service to America's Heroes

EOE

## PARTNER WITH A MAGNET HOSPITAL

BC/BE Psychiatrist needed to serve as Medical Director of an 11-bed Inpatient Behavioral Health Services Unit and to add capacity for our Outpatient Program.

Call is shared with 5 local psychiatrists. Practice is located at Aspirus Wausau Hospital, named in the top 100 hospitals in the USA by *US News and World Report*. Work with a great team of young, vibrant psychiatrists. There is great potential for program growth and development with a focus on expanded community action. Excellent compensation and benefit package included.

As you work within the open and inviting architecture of Aspirus, you will be part of our outstanding award-winning facility. We invite you to join a first-rate medical community and a family-friendly quality of life in north central Wisconsin.

Please contact Jamie Sitko today at 800-792-8728 or fax CV to 715-847-2742.

Email: [jamiesi@aspirus.org](mailto:jamiesi@aspirus.org)  
[www.aspirus.org](http://www.aspirus.org)

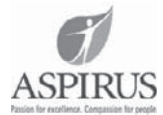

## Rush Medical College/Rush University Medical Center

CHAIR, DEPARTMENT OF PSYCHIATRY

**Rush Medical College at Rush University Medical Center** is seeking outstanding candidates for the position of Endowed Professor and Chair of the Department of Psychiatry. The Department is founded on a long tradition of excellence in clinical care, research and teaching. Currently, there are five endowed chairs in the department. The Department Chair has oversight over the Sections of Adult and Child Psychiatry. **Rush** is committed to providing outpatient and inpatient psychiatry services, with separate inpatient units for geriatric psychiatry; adult affective disorders, general psychiatry, and child psychiatry. The Chair also has responsibility for fully accredited training programs in Adult Psychiatry and Child Psychiatry.

Candidates must have an outstanding record of commitment to clinical service and research, and substantial administrative experience with an established national reputation as an academic leader. A commitment to advancement of the Department's research mission is also important. In addition, candidates must possess a commitment to innovation in the field and the leadership skills necessary for faculty development and advancement of clinical and academic missions.

**Rush Medical College** is one of the oldest medical colleges, established in 1837, and one of the largest private academic medical centers in Illinois. The Rush System for Health encompasses an 824 bed hospital serving adults and children, the 110 bed Johnston R. Bowman Center, Rush University, and four affiliate hospitals. **Rush** is a thriving center for basic and clinical research, with a newly built state-of-the-art research facility and over 1,600 active investigations.

In 2004, **Rush University Medical Center** in Chicago initiated its plan for the most comprehensive construction and facilities renovation program in its history. The "Rush Transformation" refers to Rush's plans to invest in new technology and build new facilities. This nine-year project will thoroughly redefine our physical plant and technology, as well as many of the processes we use to deliver patient care safely and efficiently.

We encourage women and minorities to apply. Nominations or letters of interest that include curriculum vitae should be sent to:

Julie Karstrand  
Staff Support for Search/Office of the Dean  
Rush University Medical Center  
600 South Paulina · Chicago, Illinois 60612

Or preferably electronically to: [Julie\\_Karstrand@rush.edu](mailto:Julie_Karstrand@rush.edu)

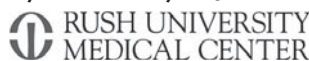

CVs should be submitted no later than **April 30, 2009**

Rush is an equal opportunity/Affirmative Action employer

IOWA HEALTH PHYSICIANS, AN AFFILIATE OF THE IOWA HEALTH SYSTEM, IS SEARCHING FOR **PSYCHIATRISTS** TO JOIN OUR GROWING PRACTICE IN DES MOINES, IOWA.

### Practice Overview

- Clinic is located on the campus of Iowa Lutheran Hospital, the state's largest private hospital-based mental health facility
- Adult inpatient and outpatient responsibilities
- Teaching opportunities available
- Call schedule 1:4
- Excellent compensation/benefit package, including a 2-year salary guarantee, production-based pay, sign-on bonus, and relocation package
- Loan repayment opportunities
- Visa sponsorship available
- First-year compensation potential of \$220,000+

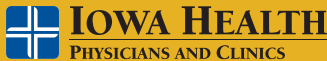

For More Information Please Contact Jessica Meisner at 888-343-4912 or at [meisnejj@ihs.org](mailto:meisnejj@ihs.org).

### BOARD-CERTIFIED / BOARD-ELIGIBLE PSYCHIATRIST

The **VA Medical Center** is looking for a Board Certified Board Eligible Psychiatrist. This person will serve as a member of a multidisciplinary team. He/she will focus on the assessment/evaluation and medication management of veterans who suffer from mental health conditions, i.e., post traumatic stress disorder (PTSD), substance abuse, depression, anxiety and other related conditions.

Candidate will provide clinical assessment/evaluation of veterans with difficult and complex mental health issues and then selecting from a variety of resources and clinical approaches including non-direct and cognitive behavior therapy, behavioral modification, insight oriented methods, family therapy, medication management, etc.

The applicant selected for this position may be eligible for education debt reduction program; approval is subject to availability of funds. Recruitment/relocation bonus is authorized for a highly qualified candidate. If interested please contact:

**VA Medical Center**  
**2121 North Avenue**  
**Grand Junction CO 81501**  
**Phone: (970) 263-5068 or**  
**Phone: (970) 263-5062**

### UTMB Correctional Managed Care

#### WANTED: HIGH QUALITY PSYCHIATRISTS

UTMB-CMC employs Psychiatrists at multiple adult and juvenile facilities all over Texas. We currently have multiple locations for child/adolescent experienced psychiatrists. We are heavy utilizers of telepsychiatry using state of the art technology and an electronic medical records.

We are a correctional healthcare system that is setting the standard for others. Correctional Managed Care is among the world's leaders in telemedicine and electronic medical record applications. Innovative programs, creative solutions and participation in the Baldrige National Quality Program further define our organization and help lead us toward performance excellence.

#### Current Opportunities Available

- ✓ BROWNWOOD: Staff Psychiatrist – Youth Services
- ✓ MART: Staff Psychiatrist – Youth Services
- ✓ AUSTIN: Staff Psychiatrist – Telemedicine Center
- ✓ CORSICANA: Staff Psychiatrist – Youth Services
- ✓ Positions also available for Psychiatric Physician Assistants and Nurse Practitioners

#### Compare our benefits with other organizations:

- ✓ Relocation allowance
- ✓ \$2000 CME stipend per fiscal year
- ✓ 5 days paid CME leave
- ✓ Competitive salaries
- ✓ Biannual CMC conferences
- ✓ M-F work schedule-day shift
- ✓ Flexible schedules
- ✓ Limited on-call rotation
- ✓ Professional liability coverage
- ✓ Comprehensive medical coverage
- ✓ Paid vacation, holidays and sick leave
- ✓ State retirement plan in ORP or TRS with State contributions.

Correctional practice eliminates many of the "headaches" of community practice such as dealing with insurance companies including Medicare and Medicaid and malpractice insurance problems.

To learn more about our programs go to:  
[www.utmb.edu/cmc](http://www.utmb.edu/cmc)

To Apply contact Debbie Dansbe 409-747-2619 or 866-900-2622 or email resume: [dsdansbe@utmb.edu](mailto:dsdansbe@utmb.edu)

UTMB is an EO/AA Employer M/F/D/V

### VICE CHAIR FOR ACADEMIC CLINICAL SERVICES DEPARTMENT OF PSYCHIATRY BRIGHAM AND WOMEN'S/FAULKNER HOSPITALS

Brigham and Women's/Faulkner Hospital, a teaching affiliate of Harvard Medical School and a founding member of the Partners Healthcare System, is seeking a master clinician-educator-investigator who will play a key role in the oversight, further strategic development, and alignment of superlative clinical services across sites, programs and divisions, with a focus on integration with research and educational activities.

Send letter and CV to:  
**David Silbersweig, M.D.**  
 Chair of Psychiatry and the Institute  
 for the Neurosciences

Department of Psychiatry  
 Brigham and Women's Hospital  
 75 Francis Street, Boston, MA 02115

E-mail: [dsilbersweig@partners.org](mailto:dsilbersweig@partners.org)

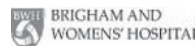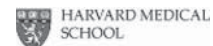

Brigham and Women's/Faulkner Hospitals are equal opportunity/affirmative action employers with strong institutional commitments to diversity in their faculty. Women and minority candidate are particularly encouraged to apply.

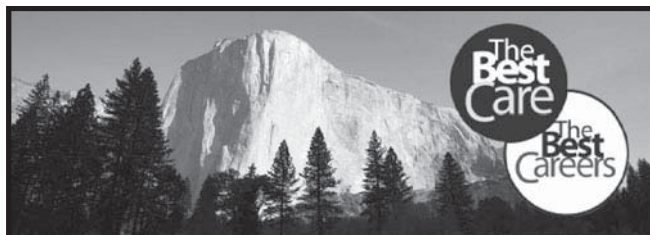

## Psychiatry Opportunities

**VA Central California Health Care System** is recruiting for THREE (3) full-time academically oriented psychiatrists to work in our, Buprenorphine Treatment Program, Outpatient Mental Health Clinic PTSD Program, and a Geriatric Psychiatrist. The Geriatric Psychiatrist is primarily an outpatient clinic position with additional opportunities to provide consults to the medical and surgical wards as well as to our Community Living Center. The VA is a core training site for the CSUF-Fresno Residency Training Program in several specialties to include psychiatry, and others. With a faculty appointment, opportunities for resident supervision, teaching and clinical research will be available. Board Certification is required. Qualifications of psychiatrist should be at minimum: Licensed in the State of California, Board Certified in the practice of adult psychiatry, and be a citizen of the United States, or a permanent resident alien. Salary range is \$150,000 - \$175,000 with potential for a recruitment bonus. Possible eligibility for Education Debt Reduction Program, if funds are available.

Interested applicants should submit their CV and three references to:

Eva Gosselin, HR Specialist, (559) 241-6454, VACCHCS (050)  
 2615 E. Clinton Ave, Fresno, CA 93703 or  
 e-mail at [eva.gosselin@va.gov](mailto:eva.gosselin@va.gov). EOE.

## PSYCHIATRISTS

The VA Needs You

Shreveport, LA  
 Alexandria, LA  
 Biloxi, MS

Pensacola, FL  
 Mt. Vernon, MO  
 Muskogee, OK

Fayetteville, AR  
 Fort Smith, AR  
 Mobile, AL

Psychiatrist positions require: BE/BC Psychiatrists, current, full, unrestricted licensure (any state), U.S. citizen Great Benefits, Excellent Pay, Rewarding Work. See announcements on [www.vacareers.va.gov](http://www.vacareers.va.gov). Recruitment/Relocation incentives may be authorized, ask contact individual for details.

**BILOXI/PENSACOLA** Outpatient and Inpatient Psychiatry positions. Expertise in substance abuse, geropsychiatry and PTSD preferred. BE/BC psychiatrist, state license (any state), U.S. citizen or permanent resident. Send applications to Jean Williams, HRMS (05A), 400 Veterans Avenue, Biloxi, MS or contact at [jean.williams@med.va.gov](mailto:jean.williams@med.va.gov) or (228) 523-5633.

**ALEXANDRIA** Strong Clinical Skills. Prefer experience in General Outpatient, Inpatient Psychiatry, and Substance Abuse. CV/Application to [heather.ball@va.gov](mailto:heather.ball@va.gov) or mail to Heather Ball/Psychiatry Service (116), P.O. Box 69004, Alexandria, LA 71306-9004. For additional questions, please call (318) 466-2958.

**SHREVEPORT** Prefer experience in Substance Abuse, PTSD. Contact Kathy Arroyo at (318)990-5154 or email at [Kathy.arroyo@va.gov](mailto:Kathy.arroyo@va.gov). Email or mail your CV to VAMC, HRMS (05) KA, 510 E. Stoner Ae, Shreveport, LA 71101.

**FAYETTEVILLE, FORT SMITH, ARKANSAS; BRANSON, MISSOURI** Contact Betty Gray (479)443-4301 ext 5188 or email: [betty.gray@va.gov](mailto:betty.gray@va.gov).

**MUSKOGEE, OK** Contact Jason Cleveland, HRMS at 918-577-3800.

**JACKSON, MISSISSIPPI** Prefer experience in general psychiatry, including inpatient, outpatient, consultative, or telemedicine psychiatry. Interested candidates should submit a CV to Felicia Owens, Human Resources (05P), VA Medical Center, 1500 E. Woodrow Wilson Dr., Jackson, MS 39216 or [Felicia.owens@va.gov](mailto:Felicia.owens@va.gov) phone: 601-364-1575.

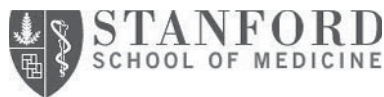

## INITIATION OF SEARCH

### ASSISTANT or ASSOCIATE PROFESSOR (Medical Center Line) PSYCHIATRY AND BEHAVIORAL SCIENCES / VAPAHCS

The Department of Psychiatry and Behavioral Sciences at Stanford University School of Medicine is seeking a full-time Assistant or Associate Professor in the Medical Center Line. This position does not confer tenure. The position will be based at the Veterans Affairs Palo Alto Health Care System.

The chosen candidate will be expected to act as a resource for teaching and clinical research in outpatient or inpatient psychiatry services. Candidates should be knowledgeable about health care issues related to the veteran and the veteran with mental health problems within the Department of Veterans Affairs, and be able to work successfully with VA researchers and managers.

The successful candidate is required to have proven clinical, administrative, and clinical research interests in adult inpatient or outpatient psychiatry, in addition to excellence in clinical teaching. In addition, the individual will be expected to take an active role in teaching Stanford psychiatry residents. Experience with Substance Abuse and/or Psychotic Disorders is desired.

Applicants must have a medical degree or equivalent degree, completed training in General Psychiatry, be either board eligible or board-certified in General Psychiatry by July 2009, and possess or be fully eligible for a California medical license.

#### General criteria for the Medical Center Line (MCL) are:

**"The major criteria for appointment, reappointment and promotion for faculty in the MCL shall be excellence in the overall mix of clinical care, clinical teaching, scholarly activity that advances clinical medicine, and institutional service."**

Stanford University is an equal opportunity employer and is committed to increasing the diversity of its faculty. It welcomes nominations of and applications from women and members of minority groups, as well as others who would bring additional dimensions to the university's research, teaching and clinical missions. I would appreciate your forwarding this announcement to individuals whom you feel would be particularly suited for this position. Interested candidates should send a copy of their curriculum vitae, a brief letter outlining their interests and the names of three references via e-mail only to:

Trisha Suppes, M.D., Ph.D.  
 c/o Stacy Moeder  
[stacy.moeder@va.gov](mailto:stacy.moeder@va.gov)  
 Psychiatry Service MIRECC/WRIISC (151-Y) • VAPAHCS  
 3801 Miranda Avenue • Palo Alto, California 94304

# Index to Advertisers

## March 2009

The publication of an advertisement in this journal does not imply endorsement of the product or service by the American Psychiatric Association.

|                                                           |         |
|-----------------------------------------------------------|---------|
| American Academy of Child and Adolescent Psychiatry ..... | A7      |
| Employment Opportunities .....                            | A26-A30 |
| Janssen Pharmaceutica                                     |         |
| Invega .....                                              | A8-A13  |
| Royal College of Psychiatrists .....                      | A19     |
| Osler Institute .....                                     | A4      |
| U.S. Pharmaceuticals, Pfizer Inc.                         |         |
| Geodon IM .....                                           | A17-A18 |
| UCB Pharma Inc.                                           |         |
| Venlafaxine .....                                         | A21-A23 |

### Subscription and Business Information

The American Journal of Psychiatry, ISSN 0002-953X, is published monthly by the American Psychiatric Association, 1000 Wilson Blvd., Suite 1825, Arlington, VA 22209-3901. Subscriptions (per year): individual \$205.00, international \$308.00. For additional subscription options, including single issues and student rates, please contact Customer Service at 1-800-368-5777 or email [appi@psych.org](mailto:appi@psych.org). Institutional subscriptions are tier priced. For institutional site license or pricing information, contact Customer Service or visit <http://highwire.stanford.edu/tfocis/>.

Business communications, address changes, and subscription questions from APA members should be directed to the Division of Member Services: (888) 35-PSYCH (toll-free). Nonmember subscribers should call the Circulation Department (800) 368-5777. Author inquiries should be directed to the Journal editorial office: (703) 907-7885 or (703) 907-7884; fax (703) 907-1096; e-mail [ajp@psych.org](mailto:ajp@psych.org).

Business Management: Nancy Frey, Director, Publishing Services; Laura G. Abedi, Associate Director, Production; Allison Jones, Advertising Prepress Manager; Robert Pursell, Director, Sales and Marketing.

Pharmaceutical Print Advertising: Frank Cox, Kathleen Harrison, Valentin Torres, Pharmaceutical Media, Inc. 30 East 33rd Street, New York, NY 10016. (212) 685-5010; fax (212) 685-6126; e-mail [vtorres@pminy.com](mailto:vtorres@pminy.com).

Nonpharmaceutical and Online Sales: Brian Skepton, (703) 907-7332; e-mail [bskepton@psych.org](mailto:bskepton@psych.org).

Pages are produced using Adobe FrameMaker+ SGML 6.0. Printed by RR Donnelley, Mendota, IL., on acid-free paper effective with Volume 164, Number 11, November 2007.

Periodicals postage paid at Arlington, VA, and additional mailing offices. POSTMASTER: Send address changes to The American Journal of Psychiatry, Circulation Department, American Psychiatric Association, 1000 Wilson Blvd., Suite 1825, Arlington, VA 22209-3901.

Indexed in Abstracts for Social Workers, Academic Abstracts, Biological Abstracts, Chemical Abstracts, Chicago Psychoanalytic Literature Index, Cumulative Index to Nursing Literature, Excerpta Medica, Hospital Literature Index, Index Medicus, International Nursing Index, Nutrition Abstracts, Psychological Abstracts, Science Citation Index, Social Science Source, and Social Sciences Index.

The American Psychiatric Association does not hold itself responsible for statements made in its publications by contributors or advertisers. Unless so stated, material in The American Journal of Psychiatry does not reflect the endorsement, official attitude, or position of the American Psychiatric Association or of the Journal's Editorial Board.

Authorization to photocopy items for internal or personal use, or the internal or personal use of specific clients, is granted by the American Psychiatric Association for libraries and other users registered with the Copyright Clearance Center (CCC) Transactional Reporting Service, provided that the base fee of \$15.00 per copy is paid directly to CCC, 222 Rosewood Drive, Danvers, MA 01923; (978) 750-8400 (tel), (978) 646-8600 (fax), [www.copyright.com](http://www.copyright.com) (web site). 0002-953X/05/\$15.00.

This consent does not extend to other kinds of copying, such as copying for general distribution, for advertising or promotional purposes, for creating new collective works, or for resale. Requests for commercial distribution should be directed to (703) 907-7894. APA does not require that permission be obtained for the photocopying of isolated articles for nonprofit classroom or library reserve use; all fees associated with such permission are waived.

Copyright © 2009 American Psychiatric Association.

# PsychiatryOnline.com

Online access to a premier collection of psychiatric resources

Just added to  
**PsychiatryOnline**

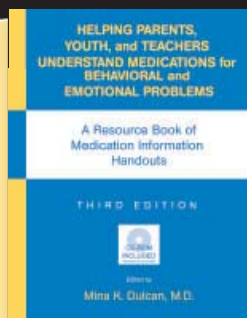

## Helping Parents, Youth, and Teachers Understand Medications for Behavioral and Emotional Problems

A Resource Book of Medication Information Handouts, Third Edition

Edited by **Mina K. Dulcan, M.D.**

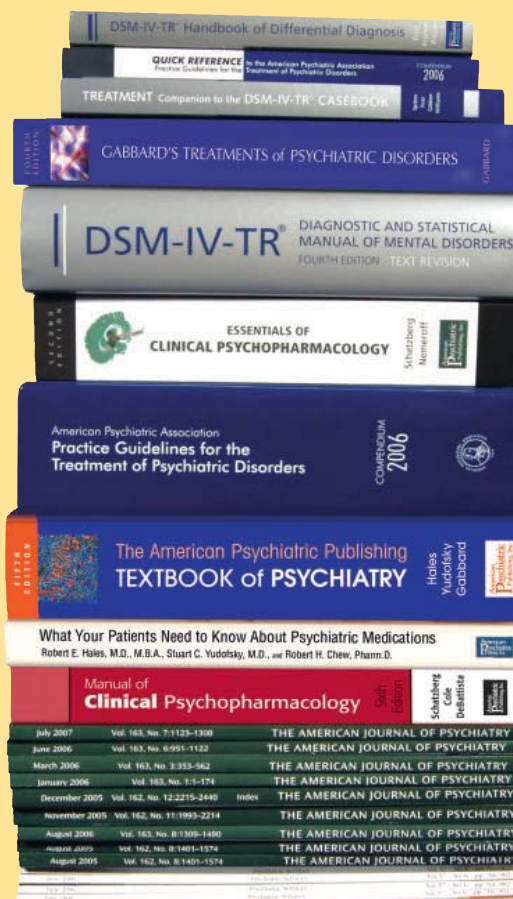

**PsychiatryOnline.com** is a powerful website that features *DSM-IV-TR*<sup>®</sup> and *The American Journal of Psychiatry* as the cornerstones of an unsurpassed collection of psychiatric references, including books, journals, and self-assessment tools. Much more than simply books and journals presented online, **PsychiatryOnline.com** features sophisticated searching and indexing tools that enable you to quickly target all the information you need.

Whether your needs are clinical, learning, or research, **PsychiatryOnline.com** provides access to the information critical to your work and everyday practice with convenient features such as:

- Search and linking tools that let you find relevant book chapters and journal articles quickly.
- Unlimited downloads to PDA so you can take book sections with you wherever you go.
- Copy and paste functions for easy creation of tables and presentations.
- Citation exports to most reference manager formats.
- Printer-friendly views that mean no reformatting when you need a hard copy.
- Saved searches and bookmarked chapters to make it easy to return to topics of interest.
- Email page feature that allows you to share the information with colleagues.

### Other subscriber benefits include:

- Book of the Month—You'll get access each month to a FREE PDF version of a featured book from American Psychiatric Publishing, Inc.
- The most up-to-date versions available including NEW *American Psychiatric Association Practice Guidelines* as they are released.
- PLUS Guideline Watches and DSM-IV-TR Coding Updates, as soon as they are available.
- American Psychiatric Association Members receive \$110 discount off a regular priced subscription. APA Members-in-Training (MITs) can save even more!

Subscribe TODAY, visit  
**www.PsychiatryOnline.com.**

Please enter priority code AH904AA when completing your request.

Interested in an institutional subscription? Please contact us at [institutions@psych.org](mailto:institutions@psych.org) or call 1-800-368-5777 ext. 8538 or 703-907-8538 more information and a subscription rate quote.

American  
**Psychiatric**  
Publishing, Inc.

The First and Last Word in Psychiatry

AH904

# NEW YORK CITY

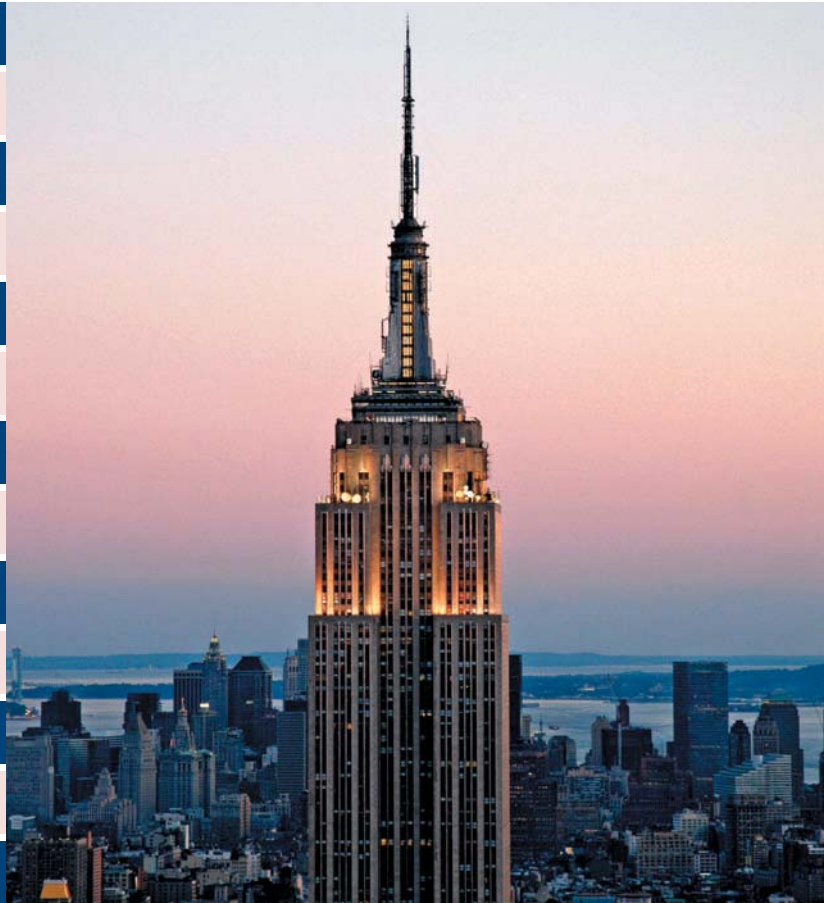

OCTOBER 8–11, 2009

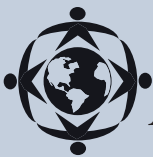

## 61st Institute on Psychiatric Services

*APA's Leading Educational Conference on Public and Community Psychiatry*

*Pride and Practice: Bringing Innovation Into Our Treatments*

**CALL FOR POSTERS**

Poster Submission Deadline: May 18, 2009

You may submit your poster **ONLINE ONLY** at [www.psych.org/IPS](http://www.psych.org/IPS).

For further information about this meeting or the submission process, please call (703) 907-7815.

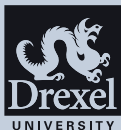

Co-sponsored by Drexel University College of Medicine/Behavioral Healthcare Education

American Psychiatric Association

# Essential New TEXTBOOKS in PSYCHIATRY

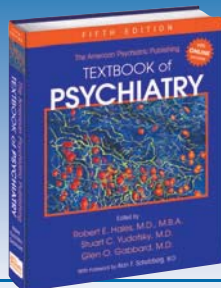

## The American Psychiatric Publishing Textbook of Psychiatry

Edited by  
Robert E. Hales, M.D., M.B.A.,  
Stuart C. Yudofsky, M.D.,  
and Glen O. Gabbard, M.D.

With Foreword by  
Alan F. Schatzberg, M.D.

This book has been meticulously revised by more than 100 contributors—65 new to this edition—summarize the latest developments in psychiatry, with new chapters on cellular and molecular biology; neuroanatomy; human sexuality and sexual dysfunctions; nonpharmacological somatic treatments; supportive psychotherapy; combined psychotherapy and pharmacotherapy; treatment of gay, lesbian, bisexual, and transgender patients; and assessment of dangerousness.

2008 • 1,818 pages  
ISBN 978-1-58562-257-3  
Hardcover • \$285.00  
Item #62257

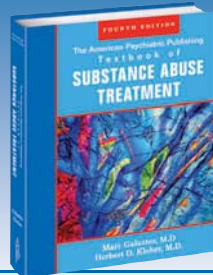

## The American Psychiatric Publishing Textbook of Substance Abuse Treatment, Fourth Edition

Edited by Marc Galanter, M.D.,  
and Herbert D. Kleber, M.D.

This book has been fully updated to present the most current scientific and clinical information on a wide range of substance use disorders. It is a comprehensive guide to treatment written at a level appropriate to both experienced and new clinicians, reflecting the expertise of leading addiction specialists in psychiatry and allied fields. With most chapters extensively revised by new authors, it incorporates the latest biomedical research findings as well as recent advances in treatment modalities and the growth of pharmacotherapies.

2008 • 768 pages  
ISBN 978-1-58562-276-4  
Hardcover • \$165.00  
Item #62276

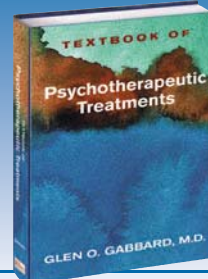

## Textbook of Psychotherapeutic Treatments

Edited by Glen O. Gabbard, M.D.

Glen O. Gabbard, author or editor of more than 22 books and over 280 scientific papers and book chapters, is a leader in the fields of psychiatry and psychoanalysis. He has assembled 50 of the world's most renowned experts in every psychotherapeutic school of thought to create this definitive volume, sure to become the standard text for all student and practicing psychotherapists.

Treatment outcome depends on carefully matching the therapeutic modality to the patient or client, and this book will both facilitate and enhance that meticulous process. Up-to-date and scientifically rigorous, this book is the "go-to" reference for the conscientious psychotherapist.

2009 • 944 pages  
ISBN 978-1-58562-304-4  
Hardcover • \$95.00  
Item #62304

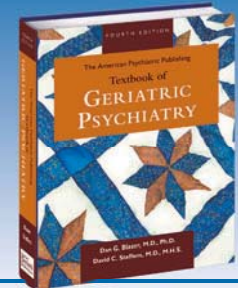

## The American Psychiatric Publishing Textbook of Geriatric Psychiatry, Fourth Edition

Dan G. Blazer, M.D., Ph.D.,  
David C. Steffens, M.D., M.H.S.

Widely recognized as the standard in its field, *The American Psychiatric Textbook of Geriatric Psychiatry* has been revised and updated while continuing the tradition of providing both scholar and clinician with the practical skills and knowledge required for understanding mental disorders in later life. It offers an authoritative review of a wide range of topics written by leaders in geriatric psychiatry, gerontology, geriatric medicine, and geriatric nursing, offering a solid grounding in both basic science and clinical applications.

2009 • 720 pages  
ISBN 978-1-58562-277-1  
Hardcover • Item #62277

Special prepublication price  
of \$134.00 until February 28,  
2009 (thereafter \$149.00)

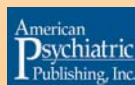

The First and Last Word in Psychiatry

Order Online: [www.appi.org](http://www.appi.org) • Phone: 1-800-368-5777 • Fax: 703-907-1091 • Email: [appi@psych.org](mailto:appi@psych.org)

Priority Code AH903
