# THE AMERICAN JOURNAL OF PSYCHIATRY

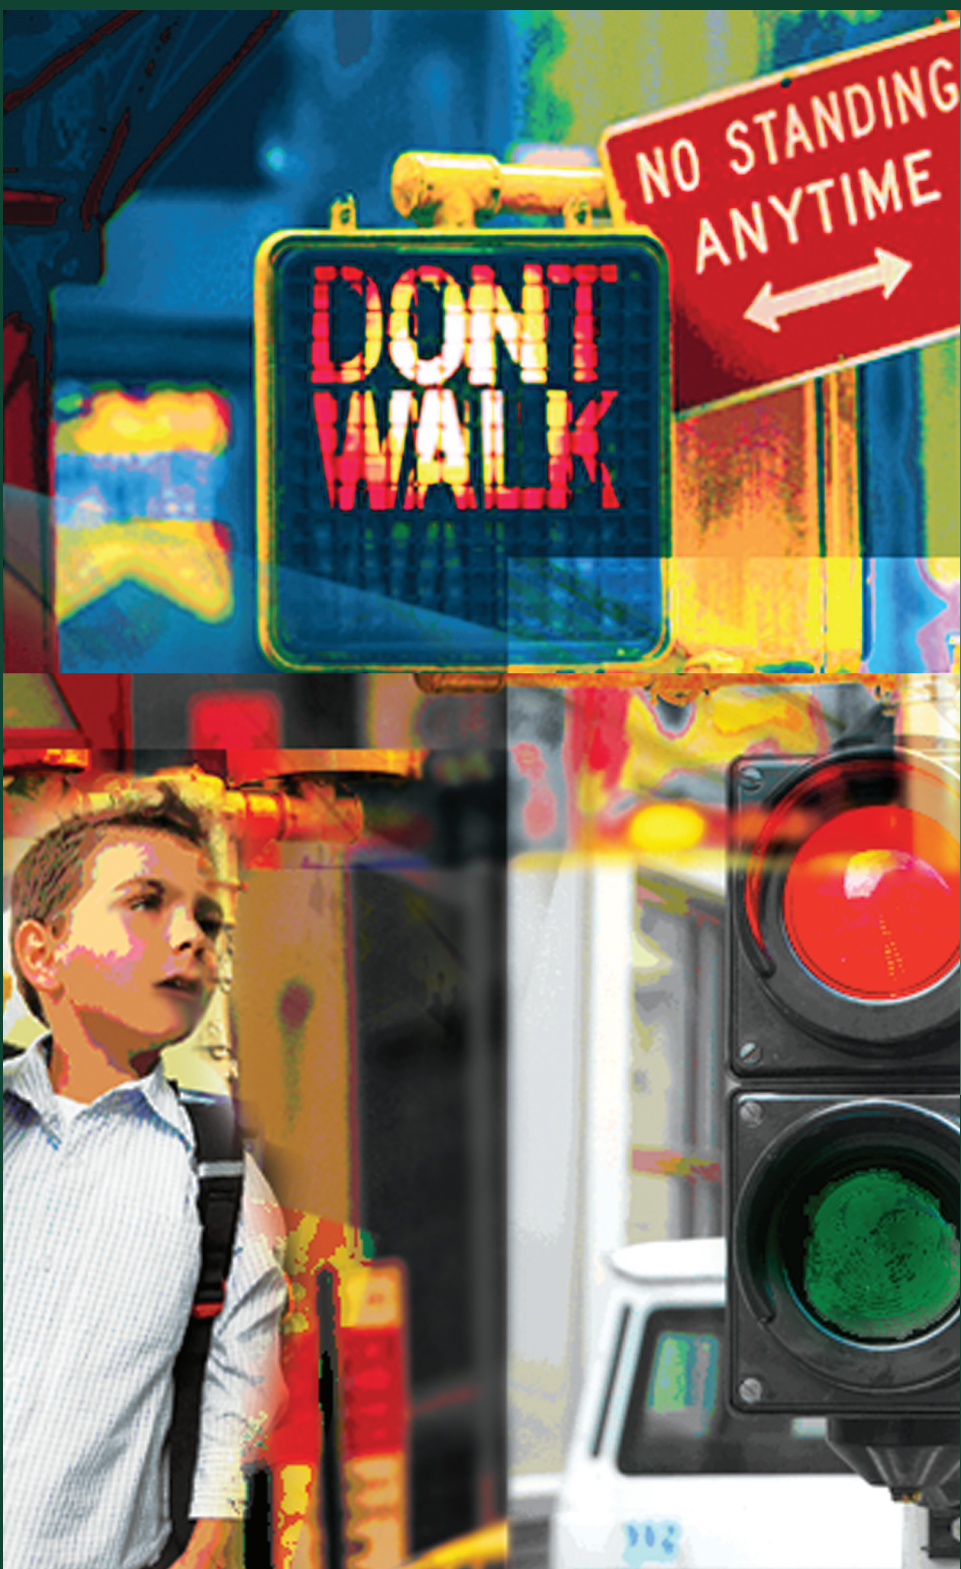

## Psychiatric Evaluation and Follow-Up of Bariatric Surgery Patients

Marsha D. Marcus, Ph.D., et al. 285

## ◀ Anticipatory Activation in the Amygdala and Anterior Cingulate in Generalized Anxiety Disorder and Prediction of Treatment Response

Jack B. Nitschke, Ph.D., et al. 302

## Selective Serotonin Reuptake Inhibitor Use and Risk of Gestational Hypertension

Sengwee Toh, M.Sc., et al. 320

## Assessment of Safety and Long- Term Outcomes of Initial Treat- ment With Placebo in TADS

Betsy D. Kennard, Psy.D., et al. 337

Continuing Medical Education 381

March 2009

Volume 166 • Number 3

Official Journal of the  
AMERICAN PSYCHIATRIC ASSOCIATION

[ajp.psychiatryonline.org](http://ajp.psychiatryonline.org)
