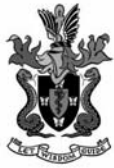

# THE BRITISH JOURNAL OF PSYCHIATRY

February 2009, VOL. 194

## Contents

A5 Editorial Board

A7 Highlights of this issue

## Editorial

101 A salience dysregulation syndrome

J. van Os

## Review article

104 Attitudes towards clinical services among people who self-harm: systematic review

T.L. Taylor, K. Hawton, S. Fortune, and N. Kapur

## Papers

111 Association of headache with childhood adversity and mental disorder: cross-national study

S. Lee, A. Tsang, M. Von Korff, R. de Graaf, C. Benjet, J.M. Haro, M. Angermeyer, K. Demyttenaere, G. de Girolamo, I. Gasquet, K. Merikangas, J. Posada-Villa, T. Takeshima, and R.C. Kessler

116 Look into my eyes—psychiatry in the movies

P. Byrne

117 Comparative epidemiology of chronic fatigue syndrome in Brazilian and British primary care: prevalence and recognition

H.J. Cho, P.R. Menezes, M. Hotopf, D. Bhugra, and S. Wessely

122 Literature and psychiatry—in 100 words

F. Oyeboode

123 Age-related grey matter volume correlates of response inhibition and shifting in attention-deficit hyperactivity disorder

G.M. McAlonan, V. Cheung, S.E. Chua, J. Oosterlaan, S. Hung, C. Tang, C. Lee, S. Kwong, T. Ho, C. Cheung, J. Suckling, and P.W.L. Leung

130 Structural and metabolic changes in language areas linked to formal thought disorder

H. Horn, A. Federspiel, M. Wirth, T.J. Müller, R. Wiest, J.-J. Wang, and W. Strik

139 Risk for depression and neural responses to fearful facial expressions of emotion

S.W.Y. Chan, R. Norbury, G.M. Goodwin, and C.J. Harmer

146 Psychological processes in bipolar affective disorder: negative cognitive style and reward processing

E. Van der Gucht, R. Morriss, G. Lancaster, P. Kinderman, and R.P. Bentall

151 Watching someone die - poems by doctors

Lenrie Peters

152 Cognitive-behavioural therapy v. social activity therapy for people with psychosis and a history of violence: randomised controlled trial

G. Haddock, C. Barrowclough, J.J. Shaw, G. Dunn, R. W. Novaco, and N. Tarrier

158 Efficacy, safety and tolerability of two risperidone dosing regimens in adolescent schizophrenia: double-blind study

M. Haas, M. Eerdeken, S. Kushner, J. Singer, I. Augustyns, J. Quiroz, G. Pandina, and V. Kusumakar

165 Reasons for discontinuing clozapine: matched, case-control comparison with risperidone long-acting injection

D.M. Taylor, P. Douglas-Hall, B. Olofinjana, E. Whiskey, and A. Thomas

168 Adolescent-onset anorexia nervosa: 18-year outcome

W. Wentz, I.C. Gillberg, H. Anckarsater, C. Gillberg, and M. Rastam

175 Suicide in dementia: 9-year national clinical survey in England and Wales

N. Purandare, R.C. Oude Voshaar, C. Rodway, H. Bickley, A. Burns, and N. Kapur

180 Post-Mortem Recollections of a Medical Lecturer (1836), Charles Lever – psychiatrists in 19th-century fiction

F. Subotsky

## Short reports

181 Duration of untreated prodromal symptoms and 12-month functional outcome of individuals at risk of psychosis

P. Fusar-Poli, A. Meneghelli, L. Valmaggia, P. Allen, F. Galvan, P. McGuire, and A. Cocchi

183 Suicide in female prisoners in England and Wales, 1978–2004

S. Fazel and R. Benning

## Columns

185 Correspondence

191 Corrections

192 Book reviews

196 Contents of *Advances in Psychiatric Treatment*

197 Contents of the *American Journal of Psychiatry*

198 From the Editor's desk

# New Feature for Residents!

## *The American Journal of Psychiatry* Residents' Journal

A FREE electronic publication produced specifically for psychiatry residents

The Residents' Journal contains special links to full text of the articles from the current *American Journal of Psychiatry* and to AJP Audio, a downloadable MP3 file featuring highlights from the issue. In addition, this e-mail bulletin contains two exclusive features:

### Journal Club Kit

A featured article presented with an overview discussing the reasons for its selection, discussion questions, and an editorial by a senior member of the field placing the article into clinical context.

### Educational Article

Case presentation that illustrates a major point in clinical practice or highlights unique treatment approaches.

Plus lively contributions from your fellow residents:

- Instructive cases
- Unique clinical or educational programs
- Perspectives on training and career development
- Discussions arising from journal club discussions

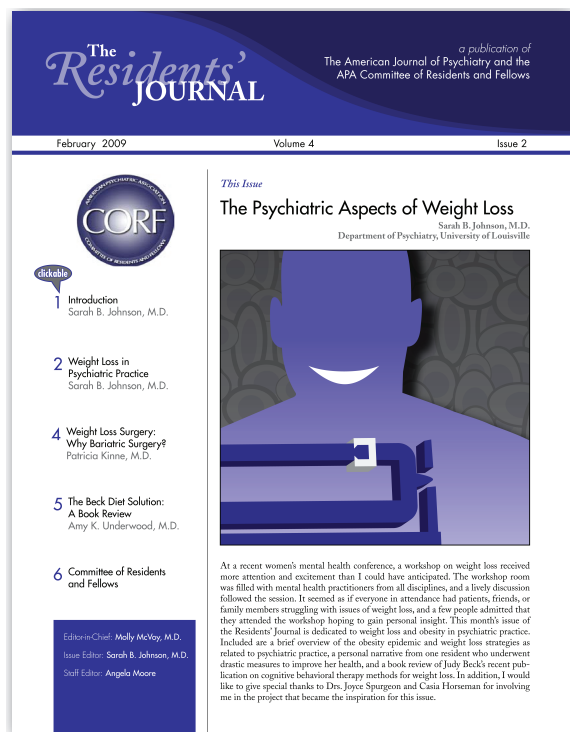

The Residents' Journal is sent free-of-charge to all psychiatry residents. Anyone interested in being included on the distribution list should contact Angela Moore, the Residents' Journal staff editor at [ajp@psych.org](mailto:ajp@psych.org) with "Subscribe to Residents' Journal" in the subject line.

# Read *The American Journal of Psychiatry* Online

Activate your FREE online access—It's as easy as 1, 2, 3!

To begin activation, go to [ajp.psychiatryonline.org](http://ajp.psychiatryonline.org) and click **SUBSCRIBE**

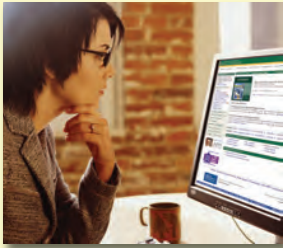

## For APA Members and Other Individuals:

1. Click on **ACTIVATE** Your Member or Individual (Non-Member) Subscription
2. Locate your 10-digit Member/Customer Number\* on your journal mailing label above your name. Be sure to enter all 10 digits, including any leading zeros.
3. Enter your number in the box and click **SUBMIT**.

On the next screen, you'll register your subscription and create a username and password that can be used immediately to access your online subscription.

\*If you are an APA Member, in most cases the number on your label will be your Member Number; if it is not, please enter your APA Member Number (with enough leading zeros to create 10 digits) instead of the number on your mailing label.

## For Institutions:

1. Click on **ACTIVATE** Your Institutional Subscription.
2. Locate your Customer Number on the journal mailing label above your name. Be sure to enter all 10-digits.
3. Enter your number in the box and click **SUBMIT**. On the next screen, you'll have the opportunity to enter IP addresses for your institution to provide seamless access for your patrons.

### Member/Customer Number

|                            |                  |
|----------------------------|------------------|
| AJP3000056866              | CART LOT88 C-015 |
| John Q. Sample             |                  |
| Mental Health Professional |                  |
| 1000 Wilson Blvd STE 1825  |                  |
| Arlington VA 22209-3924    |                  |
|                            | 01654            |

## Benefits of Online Activation

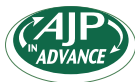

**AJP in Advance**—key research articles posted on the AJP website well in advance of their appearance in print.

**Back issue access to Volume 1, Issue 1**, starting with the *American Journal of Insanity* in 1844. (Available to institutions as a separate one-time purchase.)

**AJP CME**—interactive quizzes that offer *AMA PRA Category 1 Credits*<sup>™</sup> for selected articles from each issue (with paid subscription to the CME Course Program).

**AJP Audio**—MP3-format program summarizing findings from key articles from each issue.

**Residents' Journal**—the gateway to AJP articles and features that have most value to residents in their training.

**Precise and powerful searching** by author, keyword, and/or citation details—within any one journal, across the entire PsychiatryOnline journal collection, or across all HighWire journals.

**PubMed, CrossRef, and Google Scholar links**—from cited references to abstracts and full text; to similar articles; to other articles by the same lead authors.

**eTOCs**—Get advance email alerts with the table of contents from the latest issue.

For more information or if you cannot locate your customer number, please contact APPI Customer Service:  
Call: 1.800.368.5777 or 703.907.7322  
Email: [appi@psych.org](mailto:appi@psych.org)

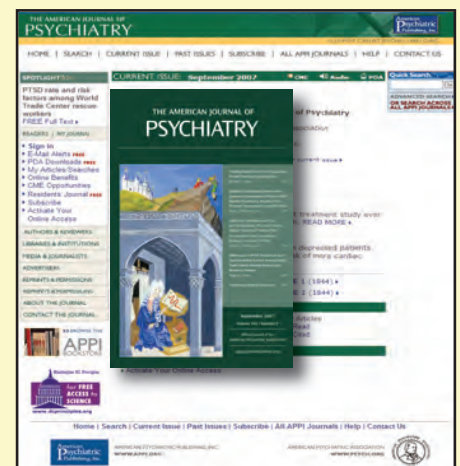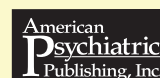

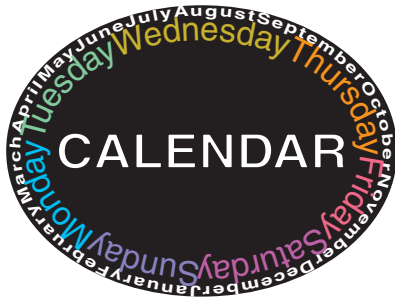

For free listing of your organization's official annual or regional meeting, please send us the following information: sponsor, location, inclusive dates, type and number of continuing education credits (if available), and the name, address, and telephone number of the person or group to contact for more information. In order for an event to appear in our listing, all notices and changes must be received at least 6 months in advance of the meeting and should be addressed to:

Calendar, American Journal of Psychiatry, 1000 Wilson Boulevard, Suite 1825, Arlington, VA 22209-3901, [jblair@psych.org](mailto:jblair@psych.org) (e-mail).

Because of space limitations, only listings of meetings of the greatest interest to Journal readers will be included.

## MARCH

**March 5–8**, 22nd Annual Meeting of the American Association for Geriatric Psychiatry, Honolulu. Contact: AAGP, 7910 Woodmont Ave., Ste. 1050, Bethesda, MD 20814-3004; (301) 654-7850 (tel), (301) 654-4137 (fax), [www.aagpmeeting.org](http://www.aagpmeeting.org) (web site).

**March 27–29**, 3rd International Conference of The International Society of Interpersonal Psychotherapy (ISIPT), New York City, NY. Contact: 2009 ISIPT Planning Committee; [hv2009@columbia.edu](mailto:hv2009@columbia.edu) (e-mail).

## APRIL

**April 2–5**, UCLA's 11th Annual Neuropsychiatry Today Conference, Kauai, Hawaii. Contact: [opce@mentalhealth.ucla.edu](mailto:opce@mentalhealth.ucla.edu) (e-mail), [www.NeuropsychiatryToday.com](http://www.NeuropsychiatryToday.com) (web site).

**April 22–26**, Annual Meeting and Scientific Sessions of the Society of Behavioral Medicine, Montreal, Quebec. Contact: Society of Behavioral Medicine, (414) 918-3156 (tel), (414) 276-3349 (fax), [info@sbm.org](mailto:info@sbm.org) (e-mail).

## MAY

**May 15–17**, 5th International Conference on Alzheimer's Disease and Related Disorders in the Middle East, Limassol, Cyprus. Contact: Conference Secretariat; 1-773-784-8134 (tel), 1-773-782-6747 (tel), 1-208-575-5453 (fax), [meetings@worldeventsforum.com](mailto:meetings@worldeventsforum.com) (e-mail), [www.worldeventsforum.com/alz.htm](http://www.worldeventsforum.com/alz.htm) (web site).

**May 16–21**, 162nd Annual Meeting of the American Psychiatric Association, San Francisco, CA. Contact: Cathy Nash, APA Annual Meetings Dept., 1000 Wilson

Blvd., Ste. 1825, Arlington, VA 22209; (703) 907-7822.

## JUNE

**June 16–20**, 2nd Thematic Conference on Legal and Forensic Psychiatry, Madrid, Spain. Contact: World Psychiatric Association, Alfredo Calcedo Barba, [forensicpsychiatry2009@gmail.com](mailto:forensicpsychiatry2009@gmail.com).

## AUGUST

**August 27–30**, Canadian Psychiatric Association 59th Annual Meeting, St. Johns, Newfoundland, Canada. Contact: 260-441 MacLaren Street, Ottawa, ON K2P 2H3, Canada; (800) 267-1555 (tel), (613) 234-9857 (fax), [conferene@cpa-apc.org](mailto:conferene@cpa-apc.org) (e-mail), [www.cpa-apc.org](http://www.cpa-apc.org) (web site).

## OCTOBER

**October 8–11**, 61st Institute on Psychiatric Services, American Psychiatric Association, New York, NY. Contact: Jill Gruber, APA Annual Meetings Dept., 1000 Wilson Blvd., Ste. 1825, Arlington, VA 22209; (703) 907-7815.

**October 27–November 1**, 56th Annual Meeting of the American Academy of Child and Adolescent Psychiatry, Honolulu, HI. Contact: AACAP, 3615 Wisconsin Avenue, N.W., Washington, DC 20016-3007; (202) 966-7300 (tel), (202) 966-2891 (fax), [meetings@aacap.org](mailto:meetings@aacap.org) (e-mail), [www.aacap.org](http://www.aacap.org) (web site).

## MAY 2010

**May 22–27**, 163rd Annual Meeting of the American Psychiatric Association, New Orleans, LA. Contact: Cathy Nash, APA Annual Meetings Dept., 1000 Wilson

Blvd., Ste. 1825, Arlington, VA 22209; (703) 907-7822.

## OCTOBER

**October 14–17**, 62nd Institute on Psychiatric Services, American Psychiatric Association, Boston, MA. Contact: Jill Gruber, APA Annual Meetings Dept., 1000 Wilson Blvd., Ste. 1825, Arlington, VA 22209; (703) 907-7815.

**October 14–17**, 57th Annual Meeting of the American Academy of Child and Adolescent Psychiatry, Boston, MA. Contact: AACAP, 3615 Wisconsin Avenue, N.W., Washington, DC 20016-3007; (202) 966-7300 (tel), (202) 966-2891 (fax), [meetings@aacap.org](mailto:meetings@aacap.org) (e-mail), [www.aacap.org](http://www.aacap.org) (web site).

## MAY 2011

**May 14–19**, 164th Annual Meeting of the American Psychiatric Association, Honolulu, HI. Contact: Cathy Nash, APA Annual Meetings Dept., 1000 Wilson Blvd., Ste. 1825, Arlington, VA 22209; (703) 907-7822.

## OCTOBER

**October 18–23**, 58th Annual Meeting of the American Academy of Child and Adolescent Psychiatry, Toronto, Ontario. Contact: AACAP, 3615 Wisconsin Avenue, N.W., Washington, DC 20016-3007; (202) 966-7300 (tel), (202) 966-2891 (fax), [meetings@aacap.org](mailto:meetings@aacap.org) (e-mail), [www.aacap.org](http://www.aacap.org) (web site).

**October 27–30**, 63rd Institute on Psychiatric Services, American Psychiatric Association, San Francisco, CA. Contact: Jill Gruber, APA Annual Meetings Dept., 1000 Wilson Blvd., Ste. 1825, Arlington, VA 22209; (703) 907-7815.
